# Supplementary material
Source: HighWire-hosted journal article supplement (https://www.jpn.ca/highwire/filestream/89536/field_highwire_adjunct_files/0/jpn-160073-1-at.pdf)
Supplement: jpn-160073-1-at.pdf [file jpn-160073-1-at.pdf]

**Appendix 1** to Hill MJ, Killick R, Navarrete K, et al. Knockdown of the schizophrenia susceptibility gene *TCF4* alters gene expression and proliferation of progenitor cells from the developing human neocortex. *J Psychiatry Neurosci* 2016.

DOI: 10.1503/jpn.160073

Copyright © 2016 The Author(s) or their employer(s). To receive this resource in an accessible format, please contact us at [cmajgroup@cmaj.ca](mailto:cmajgroup@cmaj.ca).

Online appendices are unedited and posted as supplied by the authors.

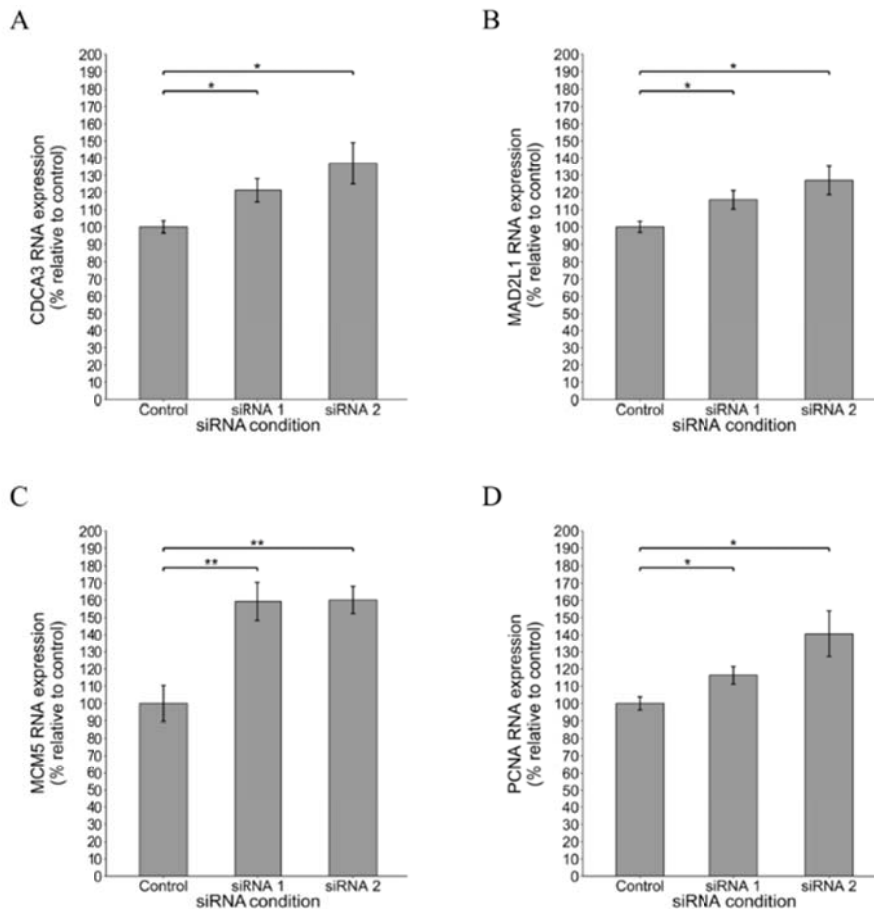

**Supplementary Figure S1.** Quantitative PCR validation of selected cell cycle gene expression changes in *TCF4* siRNA conditions compared with the control condition (n = 4 per condition). Error bars represent + / - 1 SEM. \*  $P < 0.05$ ; \*\*  $P < 0.01$ . **A.** Mean *CDCA3* expression is increased by 21% in the *TCF4* siRNA #1 condition and 37% in the *TCF4* siRNA #2 condition, compared with control. **B.** Mean *MAD2L1* expression is increased by 16% in the *TCF4* siRNA #1 condition and 27% in the *TCF4* siRNA #2 condition, compared with control. **C.** Mean *MCM5* expression is increased by 59% in the *TCF4* siRNA #1 condition and 60% in the *TCF4* siRNA #2 condition, compared with control. **D.** Mean *PCNA* expression is increased by 16% in the *TCF4* siRNA #1 condition and 41% in the *TCF4* siRNA #2 condition, compared with control.

**Appendix 1** to Hill MJ, Killick R, Navarrete K, et al. Knockdown of the schizophrenia susceptibility gene *TCF4* alters gene expression and proliferation of progenitor cells from the developing human neocortex. *J Psychiatry Neurosci* 2016.

DOI: 10.1503/jpn.160073

*Online appendices are unedited and posted as supplied by the authors.*

**Supplementary Table S1.** Primers used for qPCR validation of expression changes of selected genes involved in the cell cycle.

| <b>Gene</b>            | <b>qPCR primer F</b>  | <b>qPCR primer R</b> |
|------------------------|-----------------------|----------------------|
| <i>CDCA3</i>           | TGGTAGCTGAGGAGGAGTCT  | AGGGCCTGGTGATATCTGTG |
| <i>MAD2L1</i>          | CAGGAATTTTGTAGGCCACCA | AAATGGGAAGAGTCGGGACC |
| <i>MCM5</i>            | TCACTGGACTCATGGACTCG  | GCAGGACACTACAGCTCCTT |
| <i>PCNA</i>            | GCTGGCATCTTAGAAGCAGT  | TCCAAGATCGAGGATGAAGA |
| <i>ATP5B</i> (control) | ACAAAGACCCCTCACGATGA  | ATCTCCCAGAACAGGCCTTC |

**Appendix 1** to Hill MJ, Killick R, Navarrete K, et al. Knockdown of the schizophrenia susceptibility gene *TCF4* alters gene expression and proliferation of progenitor cells from the developing human neocortex. *J Psychiatry Neurosci* 2016.

DOI: 10.1503/jpn.160073

*Online appendices are unedited and posted as supplied by the authors.*

**Supplementary Table S2.** Gene expression changes shared by the *TCF4* siRNA #1 and *TCF4* siRNA#2 conditions, in comparison with the control siRNA condition, at  $P < 0.05$ .

| Probe ID     | Gene Symbol | P siRNA#1 | P siRNA#2 | Fold change siRNA#1 | Fold change siRNA#2 |
|--------------|-------------|-----------|-----------|---------------------|---------------------|
| ILMN_1788457 | ABCC4       | 0.00033   | 0.00208   | 1.23                | 1.22                |
| ILMN_1672878 | ABR         | 0.04200   | 0.00868   | 0.90                | 0.90                |
| ILMN_2053679 | ACADM       | 0.04706   | 0.01442   | 1.16                | 1.24                |
| ILMN_3187680 | ACCS        | 0.03999   | 0.04281   | 0.90                | 0.87                |
| ILMN_1815392 | ACTRT1      | 0.01402   | 0.01859   | 0.89                | 0.80                |
| ILMN_1803686 | ADA         | 0.04589   | 0.00433   | 0.87                | 0.78                |
| ILMN_1713751 | ADAM19      | 0.01358   | 0.00222   | 0.75                | 0.70                |
| ILMN_1712786 | AHCYL2      | 0.00882   | 0.01679   | 0.79                | 0.86                |
| ILMN_3243156 | AHNAK2      | 0.03721   | 0.03537   | 0.83                | 0.81                |
| ILMN_1747577 | ALAD        | 0.00646   | 0.01427   | 0.89                | 0.91                |
| ILMN_1702503 | ALDH3A1     | 0.00006   | 0.00696   | 0.78                | 0.85                |
| ILMN_1755974 | ALDOC       | 0.00284   | 0.00118   | 0.67                | 0.67                |
| ILMN_1779374 | AMMECR1     | 0.00370   | 0.02688   | 1.21                | 1.17                |
| ILMN_1665331 | AMT         | 0.00001   | 0.00021   | 0.81                | 0.79                |
| ILMN_1739645 | ANLN        | 0.00363   | 0.00374   | 1.24                | 1.49                |
| ILMN_1694548 | ANXA3       | 0.02933   | 0.00941   | 1.26                | 1.19                |
| ILMN_1703791 | ANXA7       | 0.01981   | 0.04225   | 1.10                | 1.09                |
| ILMN_1740772 | APBB3       | 0.00187   | 0.00006   | 0.85                | 0.82                |
| ILMN_1780170 | APOD        | 0.00025   | 0.00138   | 0.70                | 0.70                |
| ILMN_2183510 | ARMET       | 0.01817   | 0.00503   | 1.18                | 1.25                |
| ILMN_1815184 | ASPM        | 0.03821   | 0.01836   | 1.26                | 1.34                |
| ILMN_2048700 | ATAD2       | 0.01556   | 0.00384   | 1.34                | 1.42                |
| ILMN_1738530 | ATAD3A      | 0.00627   | 0.00052   | 1.33                | 1.34                |
| ILMN_1658071 | ATP1B1      | 0.04904   | 0.00740   | 1.17                | 1.14                |
| ILMN_1772506 | ATP5I       | 0.04497   | 0.04888   | 0.78                | 0.79                |
| ILMN_1680955 | AURKA       | 0.01277   | 0.00256   | 1.24                | 1.40                |
| ILMN_2357438 | AURKA       | 0.02869   | 0.03335   | 1.23                | 1.30                |
| ILMN_1691410 | BAMBI       | 0.00466   | 0.00008   | 0.84                | 0.78                |
| ILMN_1737380 | BCAP29      | 0.00217   | 0.04435   | 1.21                | 1.14                |
| ILMN_1737314 | BCL6        | 0.00028   | 0.02274   | 0.77                | 0.84                |
| ILMN_3237448 | BEND5       | 0.00358   | 0.01115   | 0.85                | 0.90                |
| ILMN_2234697 | BEX1        | 0.00434   | 0.01334   | 0.83                | 0.84                |
| ILMN_1804798 | BEXL1       | 0.00072   | 0.00478   | 0.85                | 0.85                |
| ILMN_2206746 | BGN         | 0.00447   | 0.00011   | 0.79                | 0.71                |
| ILMN_2349459 | BIRC5       | 0.00192   | 0.00329   | 1.41                | 1.44                |
| ILMN_1797793 | BLVRB       | 0.04902   | 0.02790   | 0.90                | 0.88                |
| ILMN_1724658 | BNIP3       | 0.00127   | 0.01671   | 0.69                | 0.68                |
| ILMN_1803956 | BOC         | 0.00208   | 0.00276   | 0.77                | 0.80                |
| ILMN_2311089 | BRCA1       | 0.03477   | 0.01461   | 1.12                | 1.16                |

**Appendix 1** to Hill MJ, Killick R, Navarrete K, et al. Knockdown of the schizophrenia susceptibility gene *TCF4* alters gene expression and proliferation of progenitor cells from the developing human neocortex. *J Psychiatry Neurosci* 2016.

DOI: 10.1503/jpn.160073

*Online appendices are unedited and posted as supplied by the authors.*

| Probe ID     | Gene Symbol | P siRNA#1 | P siRNA#2 | Fold change siRNA#1 | Fold change siRNA#2 |
|--------------|-------------|-----------|-----------|---------------------|---------------------|
| ILMN_1693410 | BRI3BP      | 0.03305   | 0.01326   | 1.26                | 1.25                |
| ILMN_1691927 | BTBD1       | 0.00779   | 0.01744   | 1.19                | 1.16                |
| ILMN_1767556 | C10orf10    | 0.01792   | 0.00066   | 0.81                | 0.79                |
| ILMN_1684497 | C10orf33    | 0.01977   | 0.00843   | 0.86                | 0.85                |
| ILMN_3268880 | C10orf75    | 0.00967   | 0.01364   | 0.76                | 0.77                |
| ILMN_1810376 | C11orf87    | 0.00056   | 0.00007   | 1.35                | 1.30                |
| ILMN_1682774 | C13orf27    | 0.00335   | 0.03684   | 1.20                | 1.22                |
| ILMN_1666208 | C14orf106   | 0.00247   | 0.00145   | 1.17                | 1.26                |
| ILMN_1762071 | C17orf80    | 0.00379   | 0.00061   | 1.12                | 1.18                |
| ILMN_2043615 | C17orf90    | 0.00485   | 0.01678   | 0.85                | 0.80                |
| ILMN_1670718 | C18orf51    | 0.00456   | 0.00468   | 0.59                | 0.78                |
| ILMN_2173500 | C18orf51    | 0.00088   | 0.00644   | 0.55                | 0.71                |
| ILMN_1748916 | C18orf55    | 0.01620   | 0.00536   | 1.23                | 1.26                |
| ILMN_1662578 | C1GALT1     | 0.02316   | 0.01423   | 1.13                | 1.15                |
| ILMN_1657683 | C1orf198    | 0.00028   | 0.03058   | 0.83                | 0.90                |
| ILMN_1667966 | C1orf24     | 0.00465   | 0.00262   | 1.19                | 1.23                |
| ILMN_1702231 | C1orf54     | 0.00234   | 0.00241   | 0.73                | 0.78                |
| ILMN_1716957 | C1QL1       | 0.00022   | 0.01065   | 0.67                | 0.81                |
| ILMN_1702226 | C21orf34    | 0.00100   | 0.00111   | 0.83                | 0.86                |
| ILMN_1699071 | C21orf7     | 0.00027   | 0.00849   | 0.65                | 0.80                |
| ILMN_1676822 | C2orf40     | 0.00985   | 0.00637   | 0.80                | 0.79                |
| ILMN_1705753 | C3orf26     | 0.00296   | 0.02051   | 1.32                | 1.29                |
| ILMN_1815682 | C3orf37     | 0.00944   | 0.04072   | 1.17                | 1.19                |
| ILMN_2224907 | C4orf34     | 0.01520   | 0.03966   | 0.82                | 0.83                |
| ILMN_3249240 | C4orf46     | 0.02713   | 0.02730   | 1.11                | 1.15                |
| ILMN_1790461 | C6orf125    | 0.01379   | 0.04908   | 0.88                | 0.93                |
| ILMN_1711203 | C6orf15     | 0.00007   | 0.00479   | 0.75                | 0.77                |
| ILMN_1790211 | C7orf57     | 0.00000   | 0.00126   | 1.37                | 1.20                |
| ILMN_1688772 | C8orf51     | 0.00285   | 0.00909   | 0.93                | 0.93                |
| ILMN_1708029 | C9orf127    | 0.02070   | 0.02827   | 0.80                | 0.82                |
| ILMN_1702197 | C9orf140    | 0.00315   | 0.00055   | 1.22                | 1.34                |
| ILMN_1814856 | C9orf7      | 0.00923   | 0.00453   | 0.86                | 0.86                |
| ILMN_1814044 | CABIN1      | 0.03654   | 0.00576   | 0.88                | 0.84                |
| ILMN_1737089 | CAPN5       | 0.01719   | 0.02322   | 0.82                | 0.85                |
| ILMN_1655191 | CASZ1       | 0.03400   | 0.04103   | 1.12                | 1.11                |
| ILMN_1809003 | CBR1        | 0.03224   | 0.01948   | 0.81                | 0.79                |
| ILMN_1792681 | CCDC86      | 0.02257   | 0.01262   | 1.31                | 1.29                |
| ILMN_1786125 | CCNA2       | 0.00021   | 0.01648   | 1.23                | 1.29                |
| ILMN_2412384 | CCNE2       | 0.03687   | 0.00570   | 1.25                | 1.35                |
| ILMN_1686804 | CCRK        | 0.03854   | 0.00754   | 0.87                | 0.82                |
| ILMN_1719611 | CCT6A       | 0.00205   | 0.02964   | 1.30                | 1.21                |
| ILMN_1771333 | CD47        | 0.00077   | 0.03301   | 1.21                | 1.23                |

**Appendix 1** to Hill MJ, Killick R, Navarrete K, et al. Knockdown of the schizophrenia susceptibility gene *TCF4* alters gene expression and proliferation of progenitor cells from the developing human neocortex. *J Psychiatry Neurosci* 2016.

DOI: 10.1503/jpn.160073

*Online appendices are unedited and posted as supplied by the authors.*

| Probe ID     | Gene Symbol | P siRNA#1 | P siRNA#2 | Fold change siRNA#1 | Fold change siRNA#2 |
|--------------|-------------|-----------|-----------|---------------------|---------------------|
| ILMN_2379560 | CDC14B      | 0.00756   | 0.00257   | 0.85                | 0.88                |
| ILMN_1663390 | CDC20       | 0.03444   | 0.00605   | 1.17                | 1.27                |
| ILMN_1725260 | CDC25C      | 0.00121   | 0.00142   | 1.23                | 1.28                |
| ILMN_1670238 | CDC45       | 0.02301   | 0.00011   | 1.40                | 1.41                |
| ILMN_1737728 | CDC43       | 0.00315   | 0.01198   | 1.32                | 1.38                |
| ILMN_1665559 | CDK2        | 0.00848   | 0.00404   | 1.22                | 1.37                |
| ILMN_1744295 | CDKN2A      | 0.04863   | 0.04627   | 1.13                | 1.09                |
| ILMN_1651237 | CDT1        | 0.02699   | 0.00006   | 1.20                | 1.25                |
| ILMN_1678075 | CDYL        | 0.03917   | 0.03179   | 1.10                | 1.09                |
| ILMN_1693014 | CEBPB       | 0.02263   | 0.02480   | 0.80                | 0.83                |
| ILMN_3177532 | CECR4       | 0.00436   | 0.00558   | 0.85                | 0.87                |
| ILMN_1691290 | CELSR3      | 0.04534   | 0.00394   | 0.88                | 0.85                |
| ILMN_1801257 | CENPA       | 0.04508   | 0.01553   | 1.17                | 1.33                |
| ILMN_2225718 | CENPE       | 0.01778   | 0.00026   | 1.20                | 1.33                |
| ILMN_1737195 | CENPK       | 0.00360   | 0.02893   | 1.15                | 1.27                |
| ILMN_2368718 | CENPM       | 0.03974   | 0.03720   | 1.13                | 1.15                |
| ILMN_1747016 | CEP55       | 0.00925   | 0.00014   | 1.21                | 1.46                |
| ILMN_3185161 | CEP78       | 0.04360   | 0.04577   | 1.16                | 1.22                |
| ILMN_1695645 | CETN2       | 0.00523   | 0.02558   | 0.81                | 0.88                |
| ILMN_1789830 | CFLAR       | 0.01521   | 0.02481   | 0.85                | 0.84                |
| ILMN_1730229 | CGNL1       | 0.02467   | 0.01556   | 0.88                | 0.83                |
| ILMN_1664630 | CHEK1       | 0.00688   | 0.00602   | 1.29                | 1.37                |
| ILMN_2326273 | CHI3L2      | 0.01152   | 0.00471   | 0.74                | 0.81                |
| ILMN_2331205 | CHKB        | 0.00042   | 0.02254   | 0.80                | 0.86                |
| ILMN_1798700 | CHRNA1      | 0.00062   | 0.01845   | 0.72                | 0.74                |
| ILMN_2361768 | CHRNA1      | 0.00081   | 0.00151   | 0.70                | 0.74                |
| ILMN_1756705 | CHTF18      | 0.04000   | 0.01836   | 1.16                | 1.23                |
| ILMN_1756326 | CKS2        | 0.02980   | 0.01767   | 1.24                | 1.28                |
| ILMN_2072296 | CKS2        | 0.02347   | 0.00563   | 1.17                | 1.17                |
| ILMN_2352190 | CLIP2       | 0.00716   | 0.01121   | 0.77                | 0.80                |
| ILMN_1789733 | CLIP3       | 0.00066   | 0.00583   | 0.64                | 0.67                |
| ILMN_1689400 | CLK1        | 0.02983   | 0.02538   | 1.15                | 1.10                |
| ILMN_1774974 | CLUAP1      | 0.03750   | 0.04704   | 0.88                | 0.86                |
| ILMN_1738075 | CMIP        | 0.00243   | 0.00527   | 0.79                | 0.82                |
| ILMN_1815319 | CMTM4       | 0.04062   | 0.01120   | 0.93                | 0.90                |
| ILMN_3243471 | CNPY2       | 0.02511   | 0.00526   | 0.80                | 0.80                |
| ILMN_1685122 | COL9A2      | 0.02040   | 0.04824   | 0.85                | 0.90                |
| ILMN_1777378 | COMMMD6     | 0.01205   | 0.04539   | 0.86                | 0.84                |
| ILMN_1756572 | COQ2        | 0.00308   | 0.04949   | 1.23                | 1.22                |
| ILMN_1788283 | COTL1       | 0.00051   | 0.01136   | 1.24                | 1.15                |
| ILMN_1783636 | COX6A1      | 0.04490   | 0.02223   | 0.88                | 0.91                |
| ILMN_1773855 | CPT1C       | 0.01514   | 0.00807   | 0.79                | 0.86                |

**Appendix 1** to Hill MJ, Killick R, Navarrete K, et al. Knockdown of the schizophrenia susceptibility gene *TCF4* alters gene expression and proliferation of progenitor cells from the developing human neocortex. *J Psychiatry Neurosci* 2016.

DOI: 10.1503/jpn.160073

*Online appendices are unedited and posted as supplied by the authors.*

| Probe ID     | Gene Symbol | P siRNA#1 | P siRNA#2 | Fold change siRNA#1 | Fold change siRNA#2 |
|--------------|-------------|-----------|-----------|---------------------|---------------------|
| ILMN_1680624 | CREG1       | 0.01320   | 0.00538   | 0.83                | 0.86                |
| ILMN_1739558 | CRELD1      | 0.00887   | 0.00024   | 0.77                | 0.78                |
| ILMN_3260715 | CRTC3       | 0.02858   | 0.04978   | 0.85                | 0.82                |
| ILMN_1729216 | CRYAB       | 0.00152   | 0.00138   | 0.50                | 0.56                |
| ILMN_1714397 | CRYL1       | 0.04220   | 0.03646   | 0.84                | 0.83                |
| ILMN_1685796 | CSDE1       | 0.02953   | 0.00959   | 1.07                | 1.08                |
| ILMN_1665797 | CSE1L       | 0.03539   | 0.03110   | 1.27                | 1.29                |
| ILMN_1706238 | CSE1L       | 0.01471   | 0.00219   | 1.12                | 1.34                |
| ILMN_2415235 | CSNK1E      | 0.00041   | 0.01315   | 0.83                | 0.88                |
| ILMN_1697733 | CST6        | 0.00892   | 0.00412   | 0.83                | 0.83                |
| ILMN_1721901 | CTNNAL1     | 0.00376   | 0.00639   | 1.30                | 1.22                |
| ILMN_2136446 | CTNNAL1     | 0.00508   | 0.00036   | 1.24                | 1.29                |
| ILMN_2359742 | CTSB        | 0.01164   | 0.01476   | 0.87                | 0.87                |
| ILMN_1804955 | CTSF        | 0.01277   | 0.01035   | 0.79                | 0.78                |
| ILMN_2311989 | CUTA        | 0.01275   | 0.01951   | 1.21                | 1.16                |
| ILMN_3256325 | CYB561D1    | 0.01060   | 0.02133   | 0.88                | 0.84                |
| ILMN_1714167 | CYB5A       | 0.00341   | 0.01062   | 0.81                | 0.87                |
| ILMN_1764228 | DAB2        | 0.03509   | 0.00437   | 0.84                | 0.83                |
| ILMN_1733851 | DACT3       | 0.01399   | 0.00207   | 0.85                | 0.79                |
| ILMN_2376289 | DBNL        | 0.03289   | 0.02054   | 0.90                | 0.86                |
| ILMN_1753249 | DDX10       | 0.00011   | 0.00013   | 1.67                | 1.40                |
| ILMN_1658902 | DEAF1       | 0.03719   | 0.01369   | 1.12                | 1.17                |
| ILMN_1767509 | DEF8        | 0.03402   | 0.00396   | 0.80                | 0.74                |
| ILMN_1747630 | DEK         | 0.02160   | 0.00389   | 1.16                | 1.35                |
| ILMN_1670145 | DFNA5       | 0.02325   | 0.01900   | 0.90                | 0.84                |
| ILMN_1807455 | DHRS7       | 0.00081   | 0.00186   | 0.89                | 0.79                |
| ILMN_2180352 | DIP2B       | 0.00228   | 0.03893   | 0.80                | 0.83                |
| ILMN_1676062 | DIP2C       | 0.00443   | 0.00140   | 0.78                | 0.78                |
| ILMN_1773337 | DKK1        | 0.00038   | 0.00420   | 1.48                | 1.32                |
| ILMN_1749829 | DLGAP5      | 0.02682   | 0.00261   | 1.27                | 1.37                |
| ILMN_3239771 | DLGAP5      | 0.01498   | 0.00117   | 1.21                | 1.35                |
| ILMN_1801845 | DNAL4       | 0.00610   | 0.00390   | 0.82                | 0.79                |
| ILMN_1796245 | DNASE2      | 0.00963   | 0.00363   | 0.83                | 0.80                |
| ILMN_1805200 | DNM1        | 0.01150   | 0.04412   | 0.87                | 0.91                |
| ILMN_1758629 | DONSON      | 0.04063   | 0.03763   | 1.25                | 1.19                |
| ILMN_1811328 | DPP7        | 0.01153   | 0.02212   | 0.89                | 0.84                |
| ILMN_1771622 | DRD1IP      | 0.01944   | 0.00608   | 0.80                | 0.78                |
| ILMN_1715905 | DSN1        | 0.03393   | 0.01244   | 1.16                | 1.29                |
| ILMN_2374778 | DUT         | 0.00646   | 0.00237   | 1.27                | 1.26                |
| ILMN_1768127 | EBNA1BP2    | 0.02893   | 0.01934   | 1.23                | 1.20                |
| ILMN_1653115 | ECH1        | 0.04165   | 0.02448   | 0.80                | 0.81                |
| ILMN_1767233 | EDA2R       | 0.01110   | 0.02955   | 1.12                | 1.12                |

**Appendix 1** to Hill MJ, Killick R, Navarrete K, et al. Knockdown of the schizophrenia susceptibility gene *TCF4* alters gene expression and proliferation of progenitor cells from the developing human neocortex. *J Psychiatry Neurosci* 2016.

DOI: 10.1503/jpn.160073

*Online appendices are unedited and posted as supplied by the authors.*

| Probe ID     | Gene Symbol | P siRNA#1 | P siRNA#2 | Fold change siRNA#1 | Fold change siRNA#2 |
|--------------|-------------|-----------|-----------|---------------------|---------------------|
| ILMN_1751904 | EDNRB       | 0.00007   | 0.00092   | 0.62                | 0.71                |
| ILMN_1761463 | EFHD2       | 0.04680   | 0.01589   | 1.18                | 1.11                |
| ILMN_2371055 | EFNA1       | 0.00119   | 0.00034   | 0.83                | 0.79                |
| ILMN_1695606 | EFNB3       | 0.01839   | 0.00470   | 0.87                | 0.87                |
| ILMN_1794522 | EIF5A       | 0.00831   | 0.00855   | 1.28                | 1.22                |
| ILMN_2111187 | ELOVL6      | 0.01052   | 0.00870   | 1.18                | 1.12                |
| ILMN_3245659 | ERI1        | 0.02834   | 0.03600   | 1.15                | 1.19                |
| ILMN_1751425 | ERMP1       | 0.00008   | 0.00558   | 0.83                | 0.94                |
| ILMN_1651628 | EXOC6       | 0.04002   | 0.00796   | 1.13                | 1.14                |
| ILMN_1721713 | EXOSC9      | 0.00098   | 0.00267   | 1.28                | 1.33                |
| ILMN_2312719 | EXOSC9      | 0.00486   | 0.02748   | 1.29                | 1.19                |
| ILMN_3266606 | FABP5L2     | 0.02659   | 0.04020   | 0.82                | 0.86                |
| ILMN_2410038 | FAM111A     | 0.00348   | 0.02437   | 1.09                | 1.21                |
| ILMN_1739942 | FAM117B     | 0.02072   | 0.00075   | 0.85                | 0.82                |
| ILMN_1679641 | FAM120B     | 0.01649   | 0.00110   | 0.86                | 0.82                |
| ILMN_2189605 | FAM122B     | 0.00463   | 0.01633   | 1.11                | 1.25                |
| ILMN_2387952 | FAM134B     | 0.00019   | 0.00314   | 0.67                | 0.82                |
| ILMN_1735502 | FAM181B     | 0.00432   | 0.03927   | 0.64                | 0.76                |
| ILMN_3242758 | FAM181B     | 0.00091   | 0.03473   | 0.60                | 0.85                |
| ILMN_1777261 | FAM3C       | 0.00379   | 0.00013   | 1.13                | 1.16                |
| ILMN_1781943 | FAM83D      | 0.00270   | 0.00133   | 1.25                | 1.42                |
| ILMN_1779813 | FAM96B      | 0.02359   | 0.00991   | 0.88                | 0.81                |
| ILMN_2235137 | FANCD2      | 0.01326   | 0.01104   | 1.37                | 1.29                |
| ILMN_1655642 | FANCI       | 0.01754   | 0.00754   | 1.30                | 1.36                |
| ILMN_1729175 | FBXO3       | 0.03296   | 0.04398   | 0.85                | 0.91                |
| ILMN_1771139 | FBXO31      | 0.00452   | 0.01088   | 0.84                | 0.88                |
| ILMN_1755834 | FEN1        | 0.02107   | 0.01791   | 1.24                | 1.27                |
| ILMN_2160929 | FEN1        | 0.00063   | 0.00185   | 1.41                | 1.33                |
| ILMN_1779071 | FEZ1        | 0.01099   | 0.00234   | 0.87                | 0.85                |
| ILMN_1699206 | FHDC1       | 0.00997   | 0.00107   | 0.80                | 0.79                |
| ILMN_1754114 | FLJ20021    | 0.00397   | 0.04512   | 0.78                | 0.86                |
| ILMN_1763891 | FLJ35258    | 0.00638   | 0.00926   | 0.76                | 0.79                |
| ILMN_3269324 | FLJ37644    | 0.00476   | 0.00209   | 0.77                | 0.77                |
| ILMN_1681703 | FOXO3       | 0.00651   | 0.01975   | 0.76                | 0.87                |
| ILMN_1703174 | FREM2       | 0.00019   | 0.00049   | 0.67                | 0.72                |
| ILMN_1716246 | FRZB        | 0.02493   | 0.04466   | 0.78                | 0.82                |
| ILMN_2292646 | GAD1        | 0.00414   | 0.02711   | 0.78                | 0.88                |
| ILMN_1693452 | GAL3ST4     | 0.03305   | 0.00100   | 0.85                | 0.86                |
| ILMN_1699631 | GATS        | 0.00189   | 0.00308   | 0.76                | 0.76                |
| ILMN_2278908 | GGA1        | 0.02319   | 0.00525   | 0.91                | 0.87                |
| ILMN_1806106 | GNL3        | 0.01390   | 0.00863   | 1.20                | 1.20                |
| ILMN_2103547 | GOLGA8B     | 0.03704   | 0.01000   | 0.87                | 0.86                |

**Appendix 1** to Hill MJ, Killick R, Navarrete K, et al. Knockdown of the schizophrenia susceptibility gene *TCF4* alters gene expression and proliferation of progenitor cells from the developing human neocortex. *J Psychiatry Neurosci* 2016.

DOI: 10.1503/jpn.160073

*Online appendices are unedited and posted as supplied by the authors.*

| Probe ID     | Gene Symbol | P siRNA#1 | P siRNA#2 | Fold change siRNA#1 | Fold change siRNA#2 |
|--------------|-------------|-----------|-----------|---------------------|---------------------|
| ILMN_1656145 | GOT1        | 0.04380   | 0.00275   | 1.21                | 1.11                |
| ILMN_1753575 | GP1BA       | 0.03246   | 0.00983   | 1.16                | 1.11                |
| ILMN_1651642 | GPC2        | 0.02576   | 0.01241   | 0.84                | 0.77                |
| ILMN_2352097 | GPR56       | 0.00040   | 0.02771   | 0.69                | 0.82                |
| ILMN_1730054 | GSTT1       | 0.04511   | 0.03154   | 0.84                | 0.82                |
| ILMN_1691578 | GTF3C6      | 0.00166   | 0.02595   | 1.35                | 1.17                |
| ILMN_1747183 | GXYLT1      | 0.00020   | 0.00812   | 1.39                | 1.27                |
| ILMN_2319424 | GYG2        | 0.00698   | 0.01969   | 0.79                | 0.87                |
| ILMN_2200331 | H2AFX       | 0.00904   | 0.00305   | 1.37                | 1.28                |
| ILMN_1674034 | H2AFY       | 0.00247   | 0.01881   | 0.80                | 0.80                |
| ILMN_1772455 | HDAC3       | 0.03167   | 0.04847   | 1.20                | 1.19                |
| ILMN_1792323 | HDC         | 0.00142   | 0.03069   | 0.70                | 0.86                |
| ILMN_1765621 | HDGF        | 0.00448   | 0.01594   | 1.24                | 1.19                |
| ILMN_1788203 | HEY1        | 0.01929   | 0.00837   | 0.80                | 0.77                |
| ILMN_1768973 | HIST2H2AC   | 0.04336   | 0.03559   | 0.86                | 0.84                |
| ILMN_2231242 | HMGB1       | 0.02251   | 0.00679   | 1.23                | 1.26                |
| ILMN_1654268 | HMGB2       | 0.00146   | 0.00416   | 1.37                | 1.54                |
| ILMN_1781942 | HMMR        | 0.02082   | 0.02199   | 1.26                | 1.37                |
| ILMN_2409220 | HMMR        | 0.00016   | 0.00226   | 1.37                | 1.39                |
| ILMN_1658807 | HMOX2       | 0.01213   | 0.00021   | 1.23                | 1.25                |
| ILMN_2335718 | HNRNPAB     | 0.00381   | 0.00590   | 1.32                | 1.36                |
| ILMN_3269405 | HNRNPM      | 0.02518   | 0.00995   | 1.29                | 1.38                |
| ILMN_2101920 | HNRPH1      | 0.01375   | 0.01152   | 1.29                | 1.33                |
| ILMN_1745385 | HNRPM       | 0.00014   | 0.00012   | 1.28                | 1.38                |
| ILMN_2267787 | HPS1        | 0.02977   | 0.00178   | 1.15                | 1.12                |
| ILMN_1708987 | HSD11B1L    | 0.04394   | 0.02103   | 0.83                | 0.81                |
| ILMN_1712888 | HSPH1       | 0.02240   | 0.00122   | 1.38                | 1.46                |
| ILMN_1664861 | ID1         | 0.00143   | 0.04795   | 0.77                | 0.85                |
| ILMN_1802706 | IDH3G       | 0.02989   | 0.02637   | 0.86                | 0.85                |
| ILMN_1745374 | IFI35       | 0.01864   | 0.01548   | 0.78                | 0.76                |
| ILMN_1760062 | IFI44       | 0.03014   | 0.02104   | 0.89                | 0.80                |
| ILMN_1723912 | IFI44L      | 0.03024   | 0.00932   | 0.75                | 0.57                |
| ILMN_1744635 | IGDCC3      | 0.01593   | 0.00197   | 0.70                | 0.68                |
| ILMN_3245650 | IGDCC3      | 0.03833   | 0.01726   | 0.89                | 0.85                |
| ILMN_2132982 | IGFBP5      | 0.00070   | 0.02239   | 0.80                | 0.87                |
| ILMN_2062468 | IGFBP7      | 0.04170   | 0.03379   | 0.72                | 0.76                |
| ILMN_1704353 | IGSF3       | 0.00181   | 0.00416   | 0.79                | 0.82                |
| ILMN_1729596 | INF2        | 0.02140   | 0.03333   | 1.22                | 1.17                |
| ILMN_1725169 | INTS12      | 0.04521   | 0.01115   | 0.93                | 0.91                |
| ILMN_1700231 | IP6K1       | 0.02697   | 0.04277   | 1.17                | 1.16                |
| ILMN_1764861 | ISOC1       | 0.01677   | 0.02008   | 1.14                | 1.16                |
| ILMN_1683927 | ITGAE       | 0.00788   | 0.01852   | 1.24                | 1.29                |



**Appendix 1** to Hill MJ, Killick R, Navarrete K, et al. Knockdown of the schizophrenia susceptibility gene *TCF4* alters gene expression and proliferation of progenitor cells from the developing human neocortex. *J Psychiatry Neurosci* 2016.

DOI: 10.1503/jpn.160073

*Online appendices are unedited and posted as supplied by the authors.*

| Probe ID     | Gene Symbol      | P siRNA#1 | P siRNA#2 | Fold change siRNA#1 | Fold change siRNA#2 |
|--------------|------------------|-----------|-----------|---------------------|---------------------|
| ILMN_1680453 | ITM2C            | 0.02618   | 0.01109   | 0.79                | 0.77                |
| ILMN_1764177 | JARID2           | 0.00436   | 0.01698   | 0.87                | 0.85                |
| ILMN_1747205 | JDP2             | 0.04407   | 0.00357   | 0.90                | 0.89                |
| ILMN_2169025 | JOSD2            | 0.03285   | 0.03324   | 0.85                | 0.86                |
| ILMN_1780334 | KCNJ2            | 0.00242   | 0.00579   | 1.42                | 1.26                |
| ILMN_2332440 | KCNMB2           | 0.01332   | 0.01994   | 0.83                | 0.85                |
| ILMN_1761903 | KCNS1            | 0.04765   | 0.04015   | 0.84                | 0.84                |
| ILMN_1651557 | KDELC2           | 0.00858   | 0.00915   | 1.39                | 1.42                |
| ILMN_1722820 | KDELR3           | 0.02992   | 0.01744   | 0.83                | 0.88                |
| ILMN_3250585 | KIAA0194         | 0.03812   | 0.02767   | 0.83                | 0.85                |
| ILMN_1652246 | KIAA0363         | 0.00813   | 0.00009   | 0.80                | 0.74                |
| ILMN_1745813 | KIAA1279         | 0.02141   | 0.00132   | 1.16                | 1.29                |
| ILMN_1803483 | KIAA2013         | 0.03453   | 0.04501   | 0.85                | 0.87                |
| ILMN_1794539 | KIF11            | 0.01869   | 0.00160   | 1.19                | 1.42                |
| ILMN_2143155 | KIF11            | 0.00539   | 0.00194   | 1.31                | 1.53                |
| ILMN_1695658 | KIF20A           | 0.02113   | 0.01226   | 1.13                | 1.17                |
| ILMN_1712452 | KIF20B           | 0.01089   | 0.00289   | 1.17                | 1.20                |
| ILMN_3234884 | KIF22            | 0.01440   | 0.02101   | 1.28                | 1.43                |
| ILMN_1716553 | KIF23            | 0.02674   | 0.02495   | 1.24                | 1.29                |
| ILMN_1811472 | KIF23            | 0.00662   | 0.00991   | 1.24                | 1.27                |
| ILMN_1685916 | KIF2C            | 0.00028   | 0.00080   | 1.20                | 1.27                |
| ILMN_2119224 | KIFAP3           | 0.00777   | 0.00463   | 0.87                | 0.81                |
| ILMN_1778523 | KLF9             | 0.00004   | 0.00008   | 0.73                | 0.72                |
| ILMN_2405470 | KLHDC9           | 0.03588   | 0.01855   | 0.87                | 0.84                |
| ILMN_1703949 | KPNB1            | 0.03166   | 0.02442   | 1.24                | 1.24                |
| ILMN_1658802 | KRTCAP2          | 0.02675   | 0.03664   | 0.89                | 0.81                |
| ILMN_1727495 | L3MBTL3          | 0.03809   | 0.02130   | 0.91                | 0.92                |
| ILMN_1773567 | LAMA5            | 0.00423   | 0.00788   | 0.73                | 0.77                |
| ILMN_2101832 | LAPTM4B          | 0.01505   | 0.01895   | 0.83                | 0.87                |
| ILMN_2400500 | LASS2            | 0.03183   | 0.03205   | 1.21                | 1.21                |
| ILMN_1781256 | LEFTY2           | 0.00130   | 0.03757   | 0.74                | 0.85                |
| ILMN_1785444 | LEMD1            | 0.00091   | 0.00831   | 0.61                | 0.75                |
| ILMN_1698019 | LG MN            | 0.01482   | 0.00181   | 0.89                | 0.84                |
| ILMN_2332964 | LG MN            | 0.04860   | 0.00602   | 0.86                | 0.87                |
| ILMN_1706779 | LIG1             | 0.02004   | 0.02511   | 1.21                | 1.15                |
| ILMN_1663444 | LIN7B            | 0.01456   | 0.01792   | 0.90                | 0.90                |
| ILMN_1754969 | LMCD1            | 0.02132   | 0.01326   | 0.82                | 0.84                |
| ILMN_3182893 | LOC10012816<br>3 | 0.00825   | 0.04112   | 1.19                | 1.10                |
| ILMN_3263694 | LOC10012877<br>1 | 0.02412   | 0.03150   | 0.86                | 0.80                |
| ILMN_3256868 | LOC10012958<br>5 | 0.02722   | 0.02700   | 1.20                | 1.20                |

**Appendix 1** to Hill MJ, Killick R, Navarrete K, et al. Knockdown of the schizophrenia susceptibility gene *TCF4* alters gene expression and proliferation of progenitor cells from the developing human neocortex. *J Psychiatry Neurosci* 2016.

DOI: 10.1503/jpn.160073

*Online appendices are unedited and posted as supplied by the authors.*

| Probe ID     | Gene Symbol | P siRNA#1 | P siRNA#2 | Fold change siRNA#1 | Fold change siRNA#2 |
|--------------|-------------|-----------|-----------|---------------------|---------------------|
|              | LOC10012990 |           |           |                     |                     |
| ILMN_3263864 | 5           | 0.01808   | 0.01210   | 1.24                | 1.20                |
|              | LOC10013118 |           |           |                     |                     |
| ILMN_3235188 | 7           | 0.00949   | 0.01023   | 0.91                | 0.83                |
|              | LOC10013160 |           |           |                     |                     |
| ILMN_3292224 | 9           | 0.00204   | 0.03802   | 1.44                | 1.44                |
|              | LOC10013252 |           |           |                     |                     |
| ILMN_3234436 | 8           | 0.02578   | 0.02144   | 1.24                | 1.26                |
|              | LOC10013271 |           |           |                     |                     |
| ILMN_3211935 | 5           | 0.01419   | 0.00381   | 1.17                | 1.31                |
|              | LOC10013279 |           |           |                     |                     |
| ILMN_3201986 | 5           | 0.02124   | 0.01219   | 0.82                | 0.81                |
|              | LOC10013322 |           |           |                     |                     |
| ILMN_3292892 | 4           | 0.00380   | 0.04528   | 0.79                | 0.84                |
|              | LOC10013337 |           |           |                     |                     |
| ILMN_3243291 | 2           | 0.00324   | 0.03955   | 1.22                | 1.31                |
| ILMN_1776052 | LOC148915   | 0.00241   | 0.00134   | 1.34                | 1.38                |
| ILMN_1666384 | LOC151579   | 0.02420   | 0.00506   | 1.24                | 1.28                |
| ILMN_1675460 | LOC283412   | 0.01448   | 0.04715   | 1.23                | 1.22                |
| ILMN_3289745 | LOC339352   | 0.01675   | 0.00565   | 0.77                | 0.73                |
| ILMN_3285198 | LOC389168   | 0.00875   | 0.02075   | 1.16                | 1.17                |
| ILMN_3217285 | LOC389322   | 0.01812   | 0.00866   | 1.23                | 1.29                |
| ILMN_3199609 | LOC400013   | 0.03550   | 0.00597   | 1.25                | 1.25                |
| ILMN_1791423 | LOC401052   | 0.02346   | 0.00022   | 0.85                | 0.85                |
| ILMN_1668629 | LOC401115   | 0.01364   | 0.04000   | 0.75                | 0.85                |
| ILMN_1675946 | LOC401238   | 0.04189   | 0.01823   | 0.91                | 0.84                |
| ILMN_3213568 | LOC402112   | 0.01206   | 0.00091   | 1.38                | 1.38                |
| ILMN_1727049 | LOC402509   | 0.00070   | 0.00197   | 0.86                | 0.82                |
| ILMN_1759374 | LOC440132   | 0.04142   | 0.04842   | 0.90                | 0.85                |
| ILMN_3291472 | LOC442727   | 0.00016   | 0.01920   | 1.28                | 1.21                |
| ILMN_3210741 | LOC642956   | 0.00061   | 0.00225   | 0.77                | 0.82                |
| ILMN_3278995 | LOC643167   | 0.03526   | 0.00290   | 1.26                | 1.48                |
| ILMN_1766539 | LOC643319   | 0.01061   | 0.03981   | 1.36                | 1.28                |
| ILMN_3219455 | LOC644745   | 0.02447   | 0.01411   | 1.31                | 1.29                |
| ILMN_3214052 | LOC644877   | 0.04528   | 0.03488   | 1.20                | 1.22                |
| ILMN_1691611 | LOC645436   | 0.03143   | 0.04702   | 1.12                | 1.16                |
| ILMN_1772888 | LOC645688   | 0.00900   | 0.00848   | 0.85                | 0.80                |
| ILMN_1730791 | LOC646783   | 0.02460   | 0.00609   | 0.89                | 0.85                |
| ILMN_3294365 | LOC646993   | 0.00110   | 0.00148   | 1.22                | 1.16                |
| ILMN_1759870 | LOC653066   | 0.01141   | 0.00863   | 1.09                | 1.08                |
| ILMN_1780861 | LOC653506   | 0.03914   | 0.03410   | 0.85                | 0.89                |
| ILMN_1814589 | LOC728037   | 0.03168   | 0.00691   | 1.24                | 1.16                |
| ILMN_3305849 | LOC728431   | 0.02141   | 0.00969   | 0.87                | 0.83                |
| ILMN_3304022 | LOC729102   | 0.00633   | 0.01116   | 1.20                | 1.18                |
| ILMN_1746917 | LOC729843   | 0.04370   | 0.02034   | 0.81                | 0.82                |

**Appendix 1** to Hill MJ, Killick R, Navarrete K, et al. Knockdown of the schizophrenia susceptibility gene *TCF4* alters gene expression and proliferation of progenitor cells from the developing human neocortex. *J Psychiatry Neurosci* 2016.

DOI: 10.1503/jpn.160073

*Online appendices are unedited and posted as supplied by the authors.*

| Probe ID     | Gene Symbol | P siRNA#1 | P siRNA#2 | Fold change siRNA#1 | Fold change siRNA#2 |
|--------------|-------------|-----------|-----------|---------------------|---------------------|
| ILMN_1680774 | LOC730994   | 0.00764   | 0.02126   | 0.73                | 0.74                |
| ILMN_1785756 | LOC731314   | 0.00879   | 0.00136   | 1.33                | 1.37                |
| ILMN_2172497 | LPPR4       | 0.02955   | 0.02405   | 1.33                | 1.31                |
| ILMN_1652638 | LRRC58      | 0.00461   | 0.03447   | 0.84                | 0.91                |
| ILMN_1811102 | LRSAM1      | 0.04565   | 0.03447   | 0.87                | 0.86                |
| ILMN_2092693 | LSM12       | 0.04613   | 0.01205   | 1.20                | 1.24                |
| ILMN_1737947 | LSM5        | 0.00270   | 0.03714   | 1.25                | 1.15                |
| ILMN_1744534 | LYRM5       | 0.02183   | 0.04876   | 0.90                | 0.88                |
| ILMN_1805161 | LZTR1       | 0.00304   | 0.00895   | 0.83                | 0.86                |
| ILMN_1777564 | MAD2L1      | 0.01031   | 0.00511   | 1.38                | 1.42                |
| ILMN_2395926 | MANBAL      | 0.03035   | 0.03464   | 0.80                | 0.75                |
| ILMN_1712523 | MAP6        | 0.02730   | 0.01594   | 0.84                | 0.86                |
| ILMN_1694840 | MATN2       | 0.00592   | 0.04737   | 0.82                | 0.88                |
| ILMN_2313158 | MBNL1       | 0.01947   | 0.00215   | 1.14                | 1.20                |
| ILMN_1745513 | MCAT        | 0.03418   | 0.00748   | 1.15                | 1.19                |
| ILMN_1761808 | MCFD2       | 0.00369   | 0.00197   | 1.28                | 1.42                |
| ILMN_1737205 | MCM4        | 0.00363   | 0.00380   | 1.46                | 1.54                |
| ILMN_2412860 | MCM4        | 0.02492   | 0.02510   | 1.34                | 1.36                |
| ILMN_1815169 | MCM5        | 0.00010   | 0.00001   | 1.30                | 1.39                |
| ILMN_1798654 | MCM6        | 0.03462   | 0.01777   | 1.21                | 1.28                |
| ILMN_3246388 | MED14       | 0.01789   | 0.01433   | 1.09                | 1.13                |
| ILMN_1671603 | MED30       | 0.02764   | 0.02174   | 0.87                | 0.90                |
| ILMN_1763228 | MEF2D       | 0.00507   | 0.03479   | 0.86                | 0.89                |
| ILMN_2061435 | MEG3        | 0.00036   | 0.01202   | 0.73                | 0.80                |
| ILMN_2212909 | MELK        | 0.03033   | 0.00638   | 1.28                | 1.36                |
| ILMN_1766914 | MFAP4       | 0.00009   | 0.00115   | 0.56                | 0.74                |
| ILMN_1756071 | MFGE8       | 0.03193   | 0.01849   | 0.82                | 0.84                |
| ILMN_1674874 | MFSD10      | 0.01338   | 0.01114   | 0.87                | 0.85                |
| ILMN_2342240 | MGAT2       | 0.04027   | 0.00887   | 1.18                | 1.16                |
| ILMN_1678300 | MGC40489    | 0.01157   | 0.00167   | 1.20                | 1.37                |
| ILMN_1712291 | MICALL2     | 0.00009   | 0.01591   | 0.80                | 0.91                |
| ILMN_2347068 | MKNK2       | 0.01696   | 0.04888   | 0.84                | 0.81                |
| ILMN_1679438 | MLF1IP      | 0.02887   | 0.00450   | 1.22                | 1.25                |
| ILMN_3248966 | MMADHC      | 0.00991   | 0.02813   | 1.15                | 1.18                |
| ILMN_1655915 | MMP11       | 0.00248   | 0.01703   | 0.84                | 0.87                |
| ILMN_1713143 | MRPL3       | 0.04270   | 0.04089   | 1.14                | 1.16                |
| ILMN_1657977 | MSRB2       | 0.00960   | 0.01512   | 0.79                | 0.84                |
| ILMN_1773763 | MTA2        | 0.00474   | 0.00932   | 1.34                | 1.21                |
| ILMN_1810838 | MTDH        | 0.02635   | 0.04890   | 1.20                | 1.19                |
| ILMN_1674706 | MTHFD2      | 0.02164   | 0.03639   | 1.21                | 1.13                |
| ILMN_1718271 | MTIF3       | 0.04213   | 0.00609   | 0.86                | 0.85                |
| ILMN_1786684 | MTRF1L      | 0.04374   | 0.02001   | 1.17                | 1.15                |

**Appendix 1** to Hill MJ, Killick R, Navarrete K, et al. Knockdown of the schizophrenia susceptibility gene *TCF4* alters gene expression and proliferation of progenitor cells from the developing human neocortex. *J Psychiatry Neurosci* 2016.

DOI: 10.1503/jpn.160073

*Online appendices are unedited and posted as supplied by the authors.*

| Probe ID     | Gene Symbol | P siRNA#1 | P siRNA#2 | Fold change siRNA#1 | Fold change siRNA#2 |
|--------------|-------------|-----------|-----------|---------------------|---------------------|
| ILMN_1756541 | MXD4        | 0.03170   | 0.04454   | 0.86                | 0.83                |
| ILMN_1675062 | MYL9        | 0.00721   | 0.03576   | 0.75                | 0.81                |
| ILMN_1750711 | MYO19       | 0.02352   | 0.04462   | 1.14                | 1.12                |
| ILMN_3305973 | NACAD       | 0.00329   | 0.01073   | 0.86                | 0.81                |
| ILMN_1776088 | NAT9        | 0.04127   | 0.04052   | 0.81                | 0.84                |
| ILMN_2399300 | NAV2        | 0.00791   | 0.00070   | 0.86                | 0.86                |
| ILMN_1788538 | NCALD       | 0.00412   | 0.00717   | 0.73                | 0.84                |
| ILMN_2343097 | NCALD       | 0.00174   | 0.01621   | 0.73                | 0.84                |
| ILMN_1775008 | NCAPD2      | 0.01444   | 0.02979   | 1.21                | 1.24                |
| ILMN_1683441 | NCAPD3      | 0.03308   | 0.00672   | 1.10                | 1.09                |
| ILMN_1715680 | NEIL2       | 0.04535   | 0.01949   | 1.16                | 1.21                |
| ILMN_2051373 | NEK2        | 0.01516   | 0.00043   | 1.14                | 1.15                |
| ILMN_1682197 | NFXL1       | 0.01957   | 0.00391   | 1.10                | 1.20                |
| ILMN_1807211 | NICN1       | 0.00234   | 0.00073   | 0.88                | 0.87                |
| ILMN_1716583 | NME7        | 0.04283   | 0.00051   | 1.15                | 1.24                |
| ILMN_1715508 | NNMT        | 0.00141   | 0.01599   | 0.68                | 0.81                |
| ILMN_2320250 | NOL6        | 0.00706   | 0.02015   | 1.25                | 1.22                |
| ILMN_1705407 | NOP56       | 0.02642   | 0.01535   | 1.31                | 1.16                |
| ILMN_1748476 | NOP58       | 0.02844   | 0.00631   | 1.22                | 1.27                |
| ILMN_2405297 | NOTCH2      | 0.00050   | 0.01813   | 0.85                | 0.93                |
| ILMN_1811363 | NOVA1       | 0.04435   | 0.04321   | 0.86                | 0.91                |
| ILMN_1684210 | NPAL3       | 0.02020   | 0.02780   | 0.88                | 0.84                |
| ILMN_1699574 | NRP1        | 0.04659   | 0.02786   | 1.32                | 1.28                |
| ILMN_1756049 | NT5DC3      | 0.00652   | 0.00385   | 0.80                | 0.89                |
| ILMN_1764690 | NTS         | 0.01083   | 0.02385   | 1.58                | 1.43                |
| ILMN_1658695 | NUF2        | 0.01001   | 0.00117   | 1.17                | 1.38                |
| ILMN_2323491 | NUP62       | 0.03797   | 0.03626   | 1.18                | 1.13                |
| ILMN_1734826 | NUP88       | 0.01193   | 0.01891   | 1.22                | 1.11                |
| ILMN_2404688 | NUPR1       | 0.01346   | 0.01063   | 0.77                | 0.77                |
| ILMN_1726720 | NUSAP1      | 0.00025   | 0.00027   | 1.35                | 1.28                |
| ILMN_2409298 | NUSAP1      | 0.00029   | 0.00011   | 1.31                | 1.47                |
| ILMN_1655046 | NUTF2       | 0.01288   | 0.00736   | 1.28                | 1.27                |
| ILMN_1772286 | OCIAD2      | 0.00719   | 0.00190   | 1.46                | 1.24                |
| ILMN_1748591 | ODC1        | 0.01085   | 0.00406   | 1.31                | 1.27                |
| ILMN_2196984 | OIP5        | 0.03376   | 0.00324   | 1.21                | 1.30                |
| ILMN_2400922 | OPRL1       | 0.00249   | 0.00006   | 0.82                | 0.80                |
| ILMN_1731070 | ORC6L       | 0.00019   | 0.00306   | 1.28                | 1.31                |
| ILMN_1698406 | ORMDL1      | 0.04323   | 0.00234   | 1.09                | 1.18                |
| ILMN_1720865 | OSBPL7      | 0.04239   | 0.01379   | 0.91                | 0.90                |
| ILMN_1658909 | OSGEPL1     | 0.00106   | 0.04556   | 1.09                | 1.09                |
| ILMN_1757732 | OSGIN2      | 0.03477   | 0.00861   | 1.07                | 1.22                |
| ILMN_1813544 | OXCT1       | 0.02295   | 0.01852   | 1.17                | 1.23                |

**Appendix 1** to Hill MJ, Killick R, Navarrete K, et al. Knockdown of the schizophrenia susceptibility gene *TCF4* alters gene expression and proliferation of progenitor cells from the developing human neocortex. *J Psychiatry Neurosci* 2016.

DOI: 10.1503/jpn.160073

*Online appendices are unedited and posted as supplied by the authors.*

| Probe ID     | Gene Symbol | P siRNA#1 | P siRNA#2 | Fold change siRNA#1 | Fold change siRNA#2 |
|--------------|-------------|-----------|-----------|---------------------|---------------------|
| ILMN_1795778 | P4HA2       | 0.02911   | 0.01118   | 0.85                | 0.82                |
| ILMN_2381697 | P4HA2       | 0.00862   | 0.01814   | 0.79                | 0.83                |
| ILMN_1812031 | PALM        | 0.00737   | 0.01184   | 0.87                | 0.84                |
| ILMN_1673673 | PBK         | 0.00428   | 0.00389   | 1.30                | 1.24                |
| ILMN_1714384 | PCCA        | 0.01945   | 0.04533   | 0.87                | 0.87                |
| ILMN_1703572 | PCDH20      | 0.00037   | 0.00046   | 1.43                | 1.45                |
| ILMN_1752294 | PCDH9       | 0.00440   | 0.00397   | 0.85                | 0.81                |
| ILMN_2227757 | PCDHB2      | 0.02358   | 0.00333   | 0.87                | 0.86                |
| ILMN_1694177 | PCNA        | 0.00230   | 0.00114   | 1.36                | 1.39                |
| ILMN_2228710 | PDCD5       | 0.02405   | 0.01375   | 1.22                | 1.15                |
| ILMN_1667925 | PDCL3       | 0.00206   | 0.03894   | 1.24                | 1.15                |
| ILMN_2086470 | PDGFRA      | 0.01596   | 0.00846   | 1.23                | 1.34                |
| ILMN_1815057 | PDGFRB      | 0.01311   | 0.02061   | 0.80                | 0.85                |
| ILMN_2080611 | PDSS1       | 0.02685   | 0.00163   | 1.15                | 1.20                |
| ILMN_1696962 | PDZD8       | 0.03047   | 0.03180   | 1.11                | 1.16                |
| ILMN_1683279 | PEX6        | 0.01156   | 0.01104   | 0.81                | 0.81                |
| ILMN_1653292 | PFKFB4      | 0.00175   | 0.00010   | 0.90                | 0.85                |
| ILMN_1716265 | PGM2L1      | 0.01974   | 0.01307   | 1.17                | 1.11                |
| ILMN_1775901 | PHF5A       | 0.01395   | 0.02930   | 1.14                | 1.24                |
| ILMN_1773073 | PHYH        | 0.03627   | 0.04143   | 0.83                | 0.86                |
| ILMN_1802905 | PIAS4       | 0.01125   | 0.00093   | 0.90                | 0.88                |
| ILMN_2155272 | PIF1        | 0.00925   | 0.00642   | 1.20                | 1.27                |
| ILMN_1688702 | PJA2        | 0.00597   | 0.00061   | 0.88                | 0.80                |
| ILMN_1783231 | PLEKHB1     | 0.00224   | 0.03138   | 0.74                | 0.80                |
| ILMN_2194561 | PLEKHG1     | 0.00130   | 0.02199   | 1.28                | 1.31                |
| ILMN_1790106 | PLP1        | 0.01628   | 0.01001   | 0.77                | 0.77                |
| ILMN_1791569 | PLXNA1      | 0.00744   | 0.02763   | 0.83                | 0.86                |
| ILMN_1766000 | PM20D2      | 0.00857   | 0.02531   | 1.29                | 1.20                |
| ILMN_1810864 | PMP22       | 0.03956   | 0.02147   | 0.83                | 0.76                |
| ILMN_1697189 | PNCK        | 0.00005   | 0.00003   | 0.75                | 0.69                |
| ILMN_1662587 | PNPLA7      | 0.01904   | 0.03837   | 0.86                | 0.88                |
| ILMN_1775823 | POFUT2      | 0.01602   | 0.00533   | 0.80                | 0.83                |
| ILMN_1652580 | POLD1       | 0.00989   | 0.01387   | 1.26                | 1.25                |
| ILMN_1740291 | POLQ        | 0.03571   | 0.00977   | 1.11                | 1.14                |
| ILMN_2088172 | POLR2B      | 0.04267   | 0.04228   | 1.21                | 1.34                |
| ILMN_3251691 | POLR3G      | 0.00475   | 0.01775   | 1.21                | 1.15                |
| ILMN_1675406 | PPAPDC1B    | 0.03696   | 0.01090   | 0.84                | 0.88                |
| ILMN_1715616 | PPIL5       | 0.00826   | 0.01897   | 1.31                | 1.21                |
| ILMN_1806867 | PPM1G       | 0.03038   | 0.01526   | 1.15                | 1.21                |
| ILMN_1796962 | PPP3R1      | 0.04970   | 0.03666   | 1.24                | 1.39                |
| ILMN_1797531 | PRKAG2      | 0.02564   | 0.04437   | 1.14                | 1.10                |
| ILMN_1708159 | PRKCABP     | 0.02019   | 0.01145   | 1.18                | 1.14                |

**Appendix 1** to Hill MJ, Killick R, Navarrete K, et al. Knockdown of the schizophrenia susceptibility gene *TCF4* alters gene expression and proliferation of progenitor cells from the developing human neocortex. *J Psychiatry Neurosci* 2016.

DOI: 10.1503/jpn.160073

*Online appendices are unedited and posted as supplied by the authors.*

| Probe ID     | Gene Symbol | P siRNA#1 | P siRNA#2 | Fold change siRNA#1 | Fold change siRNA#2 |
|--------------|-------------|-----------|-----------|---------------------|---------------------|
| ILMN_1799299 | PRPF38B     | 0.02714   | 0.03815   | 1.09                | 1.12                |
| ILMN_1758104 | PRPS2       | 0.01528   | 0.00628   | 1.27                | 1.23                |
| ILMN_1788701 | PSIP1       | 0.00376   | 0.00266   | 1.21                | 1.26                |
| ILMN_2396948 | PSMC3IP     | 0.00900   | 0.01214   | 1.30                | 1.25                |
| ILMN_1655316 | PSMC6       | 0.02634   | 0.02080   | 1.15                | 1.21                |
| ILMN_1779264 | PSMG1       | 0.02888   | 0.03071   | 1.38                | 1.38                |
| ILMN_1724490 | PSPC1       | 0.02080   | 0.02442   | 1.20                | 1.16                |
| ILMN_2333319 | PTBP1       | 0.03858   | 0.03898   | 1.21                | 1.24                |
| ILMN_1664464 | PTGDS       | 0.00024   | 0.00069   | 0.67                | 0.75                |
| ILMN_1719749 | PTGES3      | 0.01412   | 0.03924   | 1.31                | 1.21                |
| ILMN_1785699 | PTHLH       | 0.00257   | 0.03701   | 1.27                | 1.18                |
| ILMN_1759954 | PTMA        | 0.02985   | 0.01736   | 1.23                | 1.37                |
| ILMN_1725791 | PTPLA       | 0.01093   | 0.02948   | 0.86                | 0.83                |
| ILMN_1695509 | PTPN12      | 0.00757   | 0.03882   | 1.30                | 1.19                |
| ILMN_2400030 | PTPN2       | 0.00228   | 0.03743   | 1.21                | 1.19                |
| ILMN_1764609 | PWWP2B      | 0.00498   | 0.00045   | 1.17                | 1.21                |
| ILMN_1652394 | RAB2A       | 0.02703   | 0.01546   | 0.83                | 0.87                |
| ILMN_1803136 | RAB4B       | 0.01368   | 0.00318   | 0.81                | 0.82                |
| ILMN_1800871 | RAB6A       | 0.01388   | 0.04720   | 1.12                | 1.11                |
| ILMN_1746492 | RABL4       | 0.00412   | 0.01952   | 0.85                | 0.82                |
| ILMN_2221006 | RAD21       | 0.02571   | 0.04447   | 1.11                | 1.14                |
| ILMN_1670353 | RAD51AP1    | 0.03418   | 0.00670   | 1.26                | 1.28                |
| ILMN_1757384 | RAN         | 0.02287   | 0.01049   | 1.31                | 1.42                |
| ILMN_1721457 | RANBP1      | 0.00204   | 0.01328   | 1.32                | 1.41                |
| ILMN_1747673 | RASL10A     | 0.00522   | 0.00542   | 0.78                | 0.81                |
| ILMN_2363621 | RBBP8       | 0.04140   | 0.01599   | 1.28                | 1.37                |
| ILMN_3251415 | RBM43       | 0.01870   | 0.04338   | 0.81                | 0.88                |
| ILMN_1656837 | RBP1        | 0.01741   | 0.00065   | 0.86                | 0.80                |
| ILMN_1780987 | RFXANK      | 0.01231   | 0.00223   | 0.82                | 0.80                |
| ILMN_1812644 | RGR         | 0.02371   | 0.04960   | 0.80                | 0.84                |
| ILMN_1763704 | RGS11       | 0.03911   | 0.00104   | 0.83                | 0.83                |
| ILMN_1808226 | RGS16       | 0.01223   | 0.02411   | 0.73                | 0.77                |
| ILMN_1758067 | RGS4        | 0.00033   | 0.00453   | 1.43                | 1.22                |
| ILMN_2209766 | RHBDD1      | 0.00212   | 0.00264   | 0.86                | 0.89                |
| ILMN_1769546 | RIN2        | 0.00028   | 0.00140   | 0.82                | 0.89                |
| ILMN_1797534 | RIOK1       | 0.01887   | 0.01613   | 1.16                | 1.21                |
| ILMN_1671565 | RNASET2     | 0.03160   | 0.00493   | 0.87                | 0.86                |
| ILMN_1736533 | RND2        | 0.02610   | 0.00111   | 0.80                | 0.81                |
| ILMN_1812327 | RNF19A      | 0.01078   | 0.01262   | 0.65                | 0.62                |
| ILMN_1786039 | RNF34       | 0.00590   | 0.02109   | 1.22                | 1.15                |
| ILMN_1769637 | RNMT        | 0.00016   | 0.02254   | 0.88                | 0.87                |
| ILMN_1699476 | RPE         | 0.02135   | 0.03603   | 1.14                | 1.14                |

**Appendix 1** to Hill MJ, Killick R, Navarrete K, et al. Knockdown of the schizophrenia susceptibility gene *TCF4* alters gene expression and proliferation of progenitor cells from the developing human neocortex. *J Psychiatry Neurosci* 2016.

DOI: 10.1503/jpn.160073

*Online appendices are unedited and posted as supplied by the authors.*

| Probe ID     | Gene Symbol | P siRNA#1 | P siRNA#2 | Fold change siRNA#1 | Fold change siRNA#2 |
|--------------|-------------|-----------|-----------|---------------------|---------------------|
| ILMN_1808939 | RPS6        | 0.02927   | 0.01926   | 1.11                | 1.10                |
| ILMN_1780825 | RRAS        | 0.01761   | 0.01196   | 0.78                | 0.83                |
| ILMN_1771593 | RRM1        | 0.00675   | 0.00600   | 1.24                | 1.26                |
| ILMN_1685661 | RRP15       | 0.02529   | 0.02341   | 1.15                | 1.24                |
| ILMN_1730931 | RUFY3       | 0.02350   | 0.00610   | 0.86                | 0.78                |
| ILMN_1684306 | S100A4      | 0.01119   | 0.02787   | 0.80                | 0.82                |
| ILMN_1658678 | SAAL1       | 0.00753   | 0.01831   | 1.21                | 1.17                |
| ILMN_1705679 | SAFB2       | 0.01466   | 0.02554   | 1.18                | 1.18                |
| ILMN_1740842 | SALL2       | 0.01674   | 0.00531   | 0.84                | 0.82                |
| ILMN_1753342 | SAT1        | 0.00940   | 0.01149   | 0.73                | 0.77                |
| ILMN_1728298 | SBK1        | 0.00652   | 0.00947   | 0.87                | 0.87                |
| ILMN_1677534 | SCAP        | 0.03240   | 0.04319   | 0.88                | 0.92                |
| ILMN_1726204 | SCRG1       | 0.00015   | 0.00134   | 0.64                | 0.78                |
| ILMN_3297880 | SEC13       | 0.03810   | 0.03660   | 0.90                | 0.84                |
| ILMN_1651429 | SELM        | 0.02957   | 0.03847   | 0.75                | 0.74                |
| ILMN_1814494 | SEMA6D      | 0.00416   | 0.00224   | 0.81                | 0.86                |
| ILMN_2141482 | SERPINF1    | 0.00498   | 0.02697   | 0.61                | 0.76                |
| ILMN_1658809 | SEZ6        | 0.01495   | 0.00399   | 0.73                | 0.76                |
| ILMN_2413779 | SEZ6L2      | 0.02942   | 0.00561   | 0.89                | 0.78                |
| ILMN_1722648 | SF3B4       | 0.00200   | 0.00692   | 1.19                | 1.19                |
| ILMN_1795341 | SFRS1       | 0.01927   | 0.00486   | 1.31                | 1.44                |
| ILMN_1677162 | SFRS13A     | 0.02000   | 0.01486   | 1.16                | 1.11                |
| ILMN_1696407 | SFRS2       | 0.02504   | 0.00406   | 1.22                | 1.26                |
| ILMN_2175075 | SFRS4       | 0.04926   | 0.02195   | 1.10                | 1.20                |
| ILMN_1674620 | SGCE        | 0.02442   | 0.01646   | 0.86                | 0.85                |
| ILMN_2404906 | SGOL1       | 0.00654   | 0.01004   | 1.19                | 1.19                |
| ILMN_1746699 | SGOL2       | 0.00665   | 0.00803   | 1.29                | 1.29                |
| ILMN_1811933 | SHMT1       | 0.02110   | 0.02798   | 1.22                | 1.23                |
| ILMN_1791912 | SIDT2       | 0.00020   | 0.00786   | 0.71                | 0.74                |
| ILMN_1717925 | SIGMAR1     | 0.02977   | 0.00718   | 1.18                | 1.17                |
| ILMN_2398489 | SIGMAR1     | 0.00098   | 0.00152   | 1.19                | 1.15                |
| ILMN_1678729 | SIL1        | 0.04783   | 0.00530   | 0.86                | 0.81                |
| ILMN_1771224 | SKA1        | 0.00879   | 0.00014   | 1.17                | 1.41                |
| ILMN_2085862 | SLC15A3     | 0.01466   | 0.02977   | 0.67                | 0.76                |
| ILMN_1736546 | SLC16A14    | 0.01734   | 0.00912   | 1.23                | 1.18                |
| ILMN_2382505 | SLC22A18    | 0.00635   | 0.00324   | 0.73                | 0.69                |
| ILMN_1750981 | SLC25A26    | 0.03398   | 0.00135   | 0.92                | 0.85                |
| ILMN_1787718 | SLC27A1     | 0.00171   | 0.00779   | 0.73                | 0.82                |
| ILMN_1775708 | SLC2A3      | 0.04926   | 0.02404   | 0.90                | 0.84                |
| ILMN_1714445 | SLC6A9      | 0.00248   | 0.00130   | 0.80                | 0.79                |
| ILMN_2309180 | SMARCD3     | 0.00592   | 0.00359   | 0.82                | 0.78                |
| ILMN_1748923 | SMC2        | 0.01014   | 0.00450   | 1.17                | 1.21                |

**Appendix 1** to Hill MJ, Killick R, Navarrete K, et al. Knockdown of the schizophrenia susceptibility gene *TCF4* alters gene expression and proliferation of progenitor cells from the developing human neocortex. *J Psychiatry Neurosci* 2016.

DOI: 10.1503/jpn.160073

*Online appendices are unedited and posted as supplied by the authors.*

| Probe ID     | Gene Symbol | P siRNA#1 | P siRNA#2 | Fold change siRNA#1 | Fold change siRNA#2 |
|--------------|-------------|-----------|-----------|---------------------|---------------------|
| ILMN_3238785 | SNHG9       | 0.01959   | 0.04502   | 1.21                | 1.21                |
| ILMN_3238435 | SNORA12     | 0.01734   | 0.03319   | 0.77                | 0.80                |
| ILMN_2082762 | SNORD68     | 0.00111   | 0.01375   | 1.19                | 1.13                |
| ILMN_3247064 | SNRNP40     | 0.00827   | 0.01576   | 1.28                | 1.20                |
| ILMN_2372082 | SNRPN       | 0.00971   | 0.01040   | 0.88                | 0.86                |
| ILMN_1753241 | SNTA1       | 0.00669   | 0.01464   | 0.90                | 0.88                |
| ILMN_1653055 | SOX3        | 0.00244   | 0.04503   | 1.51                | 1.20                |
| ILMN_1815745 | SOX4        | 0.00005   | 0.00049   | 0.66                | 0.79                |
| ILMN_1775926 | SPATA6      | 0.00711   | 0.00654   | 0.86                | 0.86                |
| ILMN_2181432 | SPC24       | 0.00464   | 0.00437   | 1.39                | 1.50                |
| ILMN_1729281 | SPHK2       | 0.03970   | 0.00895   | 1.14                | 1.11                |
| ILMN_1682054 | SRI         | 0.01793   | 0.00923   | 0.79                | 0.79                |
| ILMN_1661337 | SRM         | 0.00022   | 0.00198   | 1.20                | 1.14                |
| ILMN_1798804 | SRPK1       | 0.03060   | 0.00868   | 1.21                | 1.31                |
| ILMN_1676213 | SRPX2       | 0.00494   | 0.00464   | 0.86                | 0.81                |
| ILMN_1697670 | SRRM1       | 0.04982   | 0.01061   | 1.23                | 1.25                |
| ILMN_1809478 | SSBP1       | 0.00336   | 0.02897   | 1.21                | 1.17                |
| ILMN_1711608 | SSBP2       | 0.04122   | 0.01986   | 0.87                | 0.85                |
| ILMN_2151048 | STAG1       | 0.00803   | 0.00167   | 1.15                | 1.25                |
| ILMN_1758164 | STC1        | 0.00475   | 0.00493   | 0.77                | 0.84                |
| ILMN_1727740 | SYNCRIP     | 0.03437   | 0.01266   | 1.24                | 1.19                |
| ILMN_1724407 | TACC3       | 0.00203   | 0.04550   | 1.18                | 1.20                |
| ILMN_1721093 | TAF10       | 0.01653   | 0.02718   | 0.88                | 0.87                |
| ILMN_1708147 | TBPL1       | 0.01688   | 0.02875   | 1.22                | 1.21                |
| ILMN_1814194 | TCF4        | 0.00000   | 0.00034   | 0.53                | 0.61                |
| ILMN_2313434 | TCP1        | 0.00793   | 0.02432   | 1.21                | 1.19                |
| ILMN_1791067 | TESK1       | 0.01142   | 0.03283   | 0.84                | 0.87                |
| ILMN_2096784 | TFAP2C      | 0.01373   | 0.03610   | 1.23                | 1.16                |
| ILMN_1750518 | THOC4       | 0.03914   | 0.01975   | 1.35                | 1.46                |
| ILMN_1779875 | THY1        | 0.03977   | 0.01654   | 0.80                | 0.77                |
| ILMN_1778691 | TIA1        | 0.00148   | 0.01199   | 1.11                | 1.13                |
| ILMN_1697420 | TINF2       | 0.00397   | 0.00403   | 0.75                | 0.83                |
| ILMN_2143148 | TM2D1       | 0.00539   | 0.04202   | 0.87                | 0.84                |
| ILMN_1693045 | TMED1       | 0.00682   | 0.02982   | 0.90                | 0.88                |
| ILMN_1669709 | TMEM108     | 0.01154   | 0.00476   | 0.84                | 0.84                |
| ILMN_1770977 | TMEM134     | 0.01661   | 0.01146   | 0.89                | 0.82                |
| ILMN_1774066 | TMEM141     | 0.00309   | 0.00020   | 0.84                | 0.78                |
| ILMN_2104295 | TMEM178     | 0.00143   | 0.01559   | 0.81                | 0.85                |
| ILMN_3306440 | TMEM194A    | 0.00738   | 0.03556   | 1.19                | 1.19                |
| ILMN_1770922 | TMEM45A     | 0.01671   | 0.02223   | 0.88                | 0.87                |
| ILMN_2059689 | TMEM54      | 0.02481   | 0.00019   | 0.90                | 0.84                |
| ILMN_1719649 | TMEM63A     | 0.02878   | 0.01065   | 0.84                | 0.83                |



**Appendix 1** to Hill MJ, Killick R, Navarrete K, et al. Knockdown of the schizophrenia susceptibility gene *TCF4* alters gene expression and proliferation of progenitor cells from the developing human neocortex. *J Psychiatry Neurosci* 2016.

DOI: 10.1503/jpn.160073

*Online appendices are unedited and posted as supplied by the authors.*

| Probe ID     | Gene Symbol | P siRNA#1 | P siRNA#2 | Fold change siRNA#1 | Fold change siRNA#2 |
|--------------|-------------|-----------|-----------|---------------------|---------------------|
| ILMN_1710962 | TMEM97      | 0.02713   | 0.03740   | 1.28                | 1.25                |
| ILMN_1677228 | TMLHE       | 0.04601   | 0.03062   | 0.89                | 0.88                |
| ILMN_1684929 | TOPBP1      | 0.00953   | 0.00535   | 1.08                | 1.21                |
| ILMN_1729234 | TPP1        | 0.02412   | 0.01968   | 0.79                | 0.80                |
| ILMN_2329679 | TPST2       | 0.00142   | 0.01790   | 0.78                | 0.82                |
| ILMN_2405031 | TRIM24      | 0.03787   | 0.03574   | 1.09                | 1.10                |
| ILMN_2295518 | TRO         | 0.00698   | 0.02862   | 0.84                | 0.83                |
| ILMN_1748124 | TSC22D3     | 0.00464   | 0.00989   | 0.86                | 0.84                |
| ILMN_1673111 | TSEN34      | 0.04057   | 0.02258   | 0.88                | 0.82                |
| ILMN_1681679 | TSPO        | 0.01346   | 0.02384   | 0.82                | 0.81                |
| ILMN_1806415 | TTLL1       | 0.00664   | 0.00457   | 0.83                | 0.81                |
| ILMN_1663113 | TTLL12      | 0.01657   | 0.00430   | 1.18                | 1.26                |
| ILMN_1758497 | TTYH1       | 0.00265   | 0.00201   | 0.73                | 0.70                |
| ILMN_1803045 | TUBGCP5     | 0.00715   | 0.04212   | 1.23                | 1.18                |
| ILMN_1682783 | TUG1        | 0.03830   | 0.01418   | 0.85                | 0.82                |
| ILMN_2191568 | TUSC4       | 0.03099   | 0.02522   | 0.89                | 0.88                |
| ILMN_1806040 | TYMS        | 0.00216   | 0.00330   | 1.39                | 1.35                |
| ILMN_1714730 | UBE2C       | 0.04040   | 0.00194   | 1.28                | 1.41                |
| ILMN_2301083 | UBE2C       | 0.00048   | 0.00004   | 1.35                | 1.38                |
| ILMN_1713759 | UBE2J1      | 0.01257   | 0.01898   | 1.16                | 1.16                |
| ILMN_1703108 | UBE2L6      | 0.04606   | 0.03363   | 0.95                | 0.84                |
| ILMN_1711470 | UBE2T       | 0.01761   | 0.01411   | 1.23                | 1.32                |
| ILMN_2181363 | UBE3C       | 0.04614   | 0.03300   | 1.14                | 1.21                |
| ILMN_1755462 | UGCGL1      | 0.00778   | 0.00752   | 0.87                | 0.85                |
| ILMN_1786065 | UHRF1       | 0.01031   | 0.00669   | 1.33                | 1.37                |
| ILMN_2383693 | UPF2        | 0.04571   | 0.03998   | 1.16                | 1.12                |
| ILMN_1708059 | USP13       | 0.01247   | 0.04977   | 1.25                | 1.22                |
| ILMN_1796216 | VASH1       | 0.00455   | 0.00390   | 0.82                | 0.87                |
| ILMN_2348403 | VRK3        | 0.03522   | 0.01238   | 1.19                | 1.17                |
| ILMN_1788604 | WBP2        | 0.00576   | 0.02403   | 0.77                | 0.89                |
| ILMN_1799814 | WDR57       | 0.00014   | 0.00329   | 1.32                | 1.25                |
| ILMN_1778561 | WEE1        | 0.02288   | 0.00452   | 1.25                | 1.24                |
| ILMN_2085922 | WRB         | 0.01284   | 0.00881   | 0.88                | 0.89                |
| ILMN_1790807 | XPC         | 0.01563   | 0.00017   | 1.17                | 1.24                |
| ILMN_1696266 | XRCC3       | 0.01797   | 0.00293   | 1.24                | 1.16                |
| ILMN_1743097 | XRCC6       | 0.03060   | 0.03946   | 1.25                | 1.23                |
| ILMN_2097793 | ZBTB4       | 0.03473   | 0.03254   | 0.90                | 0.87                |
| ILMN_1703370 | ZDHHC12     | 0.00739   | 0.04641   | 1.21                | 1.18                |
| ILMN_1778803 | ZFAND6      | 0.00836   | 0.02935   | 0.74                | 0.87                |
| ILMN_1651438 | ZFPM1       | 0.01857   | 0.02932   | 0.90                | 0.83                |
| ILMN_2139052 | ZKSCAN1     | 0.03002   | 0.03970   | 0.93                | 0.85                |
| ILMN_3251506 | ZNF69       | 0.02434   | 0.02555   | 1.16                | 1.17                |

**Appendix 1** to Hill MJ, Killick R, Navarrete K, et al. Knockdown of the schizophrenia susceptibility gene *TCF4* alters gene expression and proliferation of progenitor cells from the developing human neocortex. *J Psychiatry Neurosci* 2016.

DOI: 10.1503/jpn.160073

*Online appendices are unedited and posted as supplied by the authors.*

| <b>Probe ID</b> | <b>Gene Symbol</b> | <b>P siRNA#1</b> | <b>P siRNA#2</b> | <b>Fold change siRNA#1</b> | <b>Fold change siRNA#2</b> |
|-----------------|--------------------|------------------|------------------|----------------------------|----------------------------|
| ILMN_2175447    | ZNF767             | 0.02200          | 0.01598          | 0.89                       | 0.89                       |
| ILMN_2374633    | ZWILCH             | 0.00842          | 0.00823          | 1.36                       | 1.38                       |
| ILMN_2362545    | ZWINT              | 0.00267          | 0.00325          | 1.29                       | 1.25                       |
| ILMN_2362549    | ZWINT              | 0.00133          | 0.01731          | 1.31                       | 1.29                       |
| ILMN_1827211    |                    | 0.00566          | 0.00341          | 0.82                       | 0.84                       |
| ILMN_1857017    |                    | 0.03709          | 0.03041          | 0.95                       | 0.89                       |
| ILMN_1887357    |                    | 0.00847          | 0.03312          | 0.89                       | 0.87                       |
| ILMN_1900795    |                    | 0.01612          | 0.03829          | 0.88                       | 0.87                       |

**Appendix 1** to Hill MJ, Killick R, Navarrete K, et al. Knockdown of the schizophrenia susceptibility gene *TCF4* alters gene expression and proliferation of progenitor cells from the developing human neocortex. *J Psychiatry Neurosci* 2016.

DOI: 10.1503/jpn.160073

*Online appendices are unedited and posted as supplied by the authors.*

**Supplementary Table S3.** Biological process Gene Ontology terms in which the 628 differentially expressed genes (shared by both *TCF4* siRNA conditions at  $P < 0.05$ ) are significantly enriched.

| Gene Ontology Term                               | Count | %     | Fold Enrichment | P        | Bonferroni-corrected P |
|--------------------------------------------------|-------|-------|-----------------|----------|------------------------|
| GO:0000279~M phase                               | 50    | 9.14  | 3.17            | 3.10E-13 | 6.30E-10               |
| GO:0000280~nuclear division                      | 40    | 7.31  | 3.41            | 1.04E-11 | 2.12E-08               |
| GO:0007067~mitosis                               | 40    | 7.31  | 3.41            | 1.04E-11 | 2.12E-08               |
| GO:0000087~M phase of mitotic cell cycle         | 40    | 7.31  | 3.37            | 1.49E-11 | 3.03E-08               |
| GO:0048285~organelle fission                     | 40    | 7.31  | 3.25            | 5.00E-11 | 1.02E-07               |
| GO:0022403~cell cycle phase                      | 53    | 9.69  | 2.65            | 6.75E-11 | 1.37E-07               |
| GO:0051301~cell division                         | 43    | 7.86  | 2.88            | 4.82E-10 | 9.78E-07               |
| GO:0022402~cell cycle process                    | 59    | 10.79 | 2.19            | 9.96E-09 | 2.02E-05               |
| GO:0000278~mitotic cell cycle                    | 46    | 8.41  | 2.36            | 7.01E-08 | 1.42E-04               |
| GO:0007049~cell cycle                            | 70    | 12.80 | 1.91            | 9.46E-08 | 1.92E-04               |
| GO:0007059~chromosome segregation                | 19    | 3.47  | 4.34            | 1.57E-07 | 3.19E-04               |
| GO:0006259~DNA metabolic process                 | 46    | 8.41  | 1.97            | 1.09E-05 | 0.0219                 |
| GO:0007346~regulation of mitotic cell cycle      | 21    | 3.84  | 2.99            | 1.61E-05 | 0.0321                 |
| GO:0000075~cell cycle checkpoint                 | 16    | 2.93  | 3.40            | 4.76E-05 | 0.0920                 |
| GO:0000226~microtubule cytoskeleton organization | 19    | 3.47  | 2.89            | 7.28E-05 | 0.1374                 |
| GO:0007017~microtubule-based process             | 25    | 4.57  | 2.39            | 9.33E-05 | 0.1725                 |
| GO:0006260~DNA replication                       | 23    | 4.20  | 2.50            | 1.03E-04 | 0.1892                 |
| GO:0010564~regulation of cell cycle process      | 15    | 2.74  | 2.98            | 3.81E-04 | 0.5389                 |
| GO:0048015~phosphoinositide-mediated signaling   | 9     | 1.65  | 4.65            | 4.55E-04 | 0.6029                 |
| GO:0007051~spindle organization                  | 10    | 1.83  | 4.08            | 5.27E-04 | 0.6567                 |
| GO:0051726~regulation of cell cycle              | 30    | 5.48  | 1.96            | 5.52E-04 | 0.6741                 |
| GO:0000070~mitotic sister chromatid segregation  | 9     | 1.65  | 4.50            | 5.79E-04 | 0.6915                 |
| GO:0000819~sister chromatid segregation          | 9     | 1.65  | 4.50            | 5.79E-04 | 0.6915                 |
| GO:0006270~DNA replication initiation            | 5     | 0.91  | 5.97            | 0.0076   | 1                      |
| GO:0006281~DNA repair                            | 24    | 4.39  | 1.76            | 0.0086   | 1                      |
| GO:0051327~M phase of meiotic cell cycle         | 10    | 1.83  | 2.72            | 0.0098   | 1                      |
| GO:0007126~meiosis                               | 10    | 1.83  | 2.72            | 0.0098   | 1                      |
| GO:0051321~meiotic cell cycle                    | 10    | 1.83  | 2.63            | 0.0123   | 1                      |
| GO:0031570~DNA integrity checkpoint              | 8     | 1.46  | 3.10            | 0.0127   | 1                      |
| GO:0006261~DNA-dependent DNA replication         | 9     | 1.65  | 2.79            | 0.0135   | 1                      |
| GO:0006974~response to DNA damage stimulus       | 29    | 5.30  | 1.59            | 0.0143   | 1                      |
| GO:0019932~second-messenger-mediated signaling   | 11    | 2.01  | 2.40            | 0.0147   | 1                      |
| GO:0006310~DNA recombination                     | 11    | 2.01  | 2.40            | 0.0147   | 1                      |

**Appendix 1** to Hill MJ, Killick R, Navarrete K, et al. Knockdown of the schizophrenia susceptibility gene *TCF4* alters gene expression and proliferation of progenitor cells from the developing human neocortex. *J Psychiatry Neurosci* 2016.

DOI: 10.1503/jpn.160073

*Online appendices are unedited and posted as supplied by the authors.*

| <b>Gene Ontology Term</b>                         | <b>Count</b> | <b>%</b> | <b>Fold Enrichment</b> | <b>P</b> | <b>Bonferroni-corrected P</b> |
|---------------------------------------------------|--------------|----------|------------------------|----------|-------------------------------|
| GO:0007010~cytoskeleton organization              | 26           | 4.75     | 1.58                   | 0.0220   | 1                             |
| GO:0007076~mitotic chromosome condensation        | 4            | 0.73     | 6.21                   | 0.0226   | 1                             |
| GO:0006631~fatty acid metabolic process           | 13           | 2.38     | 2.00                   | 0.0279   | 1                             |
| GO:0006266~DNA ligation                           | 3            | 0.55     | 9.31                   | 0.0362   | 1                             |
| GO:0007088~regulation of mitosis                  | 7            | 1.28     | 2.78                   | 0.0366   | 1                             |
| GO:0051783~regulation of nuclear division         | 7            | 1.28     | 2.78                   | 0.0366   | 1                             |
| GO:0051052~regulation of DNA metabolic process    | 10           | 1.83     | 2.19                   | 0.0370   | 1                             |
| GO:0042401~biogenic amine biosynthetic process    | 4            | 0.73     | 5.17                   | 0.0376   | 1                             |
| GO:0006633~fatty acid biosynthetic process        | 7            | 1.28     | 2.65                   | 0.0453   | 1                             |
| GO:0007098~centrosome cycle                       | 4            | 0.73     | 4.77                   | 0.0466   | 1                             |
| GO:0006323~DNA packaging                          | 9            | 1.65     | 2.22                   | 0.0474   | 1                             |
| GO:0000398~nuclear mRNA splicing, via spliceosome | 15           | 2.74     | 1.74                   | 0.0483   | 1                             |

**Appendix 1** to Hill MJ, Killick R, Navarrete K, et al. Knockdown of the schizophrenia susceptibility gene *TCF4* alters gene expression and proliferation of progenitor cells from the developing human neocortex. *J Psychiatry Neurosci* 2016.

DOI: 10.1503/jpn.160073

*Online appendices are unedited and posted as supplied by the authors.*

**Supplementary Table S4.** MAGMA-generated *P*-values for schizophrenia association at genes that were differentially expressed in association with both *TCF4* siRNA conditions (at *P* < 0.05). Schizophrenia genome-wide association study data were generated by the Psychiatric Genomics Consortium (2014) and downloaded from <https://www.med.unc.edu/pgc/results-and-downloads>.

| Gene            | Entrez ID | chromosome | start     | stop      | n_snps | n_param | zstat | <i>P</i> -value |
|-----------------|-----------|------------|-----------|-----------|--------|---------|-------|-----------------|
| <i>XRCC3</i>    | 7517      | 14         | 104163954 | 104181823 | 30     | 11      | 6.38  | 8.86E-11        |
| <i>DFNA5</i>    | 1687      | 7          | 24737974  | 24797639  | 230    | 53      | 5.50  | 1.95E-08        |
| <i>GNL3</i>     | 26354     | 3          | 52719936  | 52728513  | 11     | 5       | 5.46  | 2.40E-08        |
| <i>STAG1</i>    | 10274     | 3          | 136055999 | 136471245 | 596    | 146     | 5.23  | 8.55E-08        |
| <i>CENPM</i>    | 79019     | 22         | 42334741  | 42343148  | 26     | 5       | 5.19  | 1.08E-07        |
| <i>FOXO3</i>    | 2309      | 6          | 108881026 | 109005971 | 152    | 19      | 5.07  | 2.04E-07        |
| <i>NCAPD3</i>   | 23310     | 11         | 134022337 | 134094426 | 122    | 27      | 4.47  | 3.91E-06        |
| <i>CDC20</i>    | 991       | 1          | 43824626  | 43828874  | 5      | 5       | 4.35  | 6.71E-06        |
| <i>PPAPDC1B</i> | 84513     | 8          | 38120648  | 38126738  | 4      | 2       | 4.27  | 9.80E-06        |
| <i>SGCE</i>     | 8910      | 7          | 94214536  | 94285521  | 91     | 16      | 4.25  | 0.0000109       |
| <i>C1orf54</i>  | 79630     | 1          | 150245183 | 150253335 | 13     | 6       | 4.20  | 0.0000132       |
| <i>KIAA1279</i> | 26128     | 10         | 70748477  | 70776739  | 85     | 20      | 4.17  | 0.0000152       |
| <i>SNRNP40</i>  | 9410      | 1          | 31732415  | 31769644  | 92     | 7       | 4.06  | 0.0000242       |
| <i>NUTF2</i>    | 10204     | 16         | 67880819  | 67905219  | 30     | 9       | 4.03  | 0.0000284       |
| <i>CSDE1</i>    | 7812      | 1          | 115259534 | 115300671 | 73     | 19      | 3.75  | 0.000089        |
| <i>PSIP1</i>    | 11168     | 9          | 15464064  | 15511003  | 101    | 22      | 3.71  | 0.0001024       |
| <i>SYNCRIP</i>  | 10492     | 6          | 86317502  | 86353043  | 52     | 17      | 3.69  | 0.0001105       |
| <i>HMOX2</i>    | 3163      | 16         | 4524719   | 4560348   | 98     | 12      | 3.61  | 0.0001514       |
| <i>ERI1</i>     | 90459     | 8          | 8860314   | 8890849   | 99     | 14      | 3.58  | 0.0001734       |
| <i>ZDHHC12</i>  | 84885     | 9          | 131483148 | 131486408 | 1      | 1       | 3.55  | 0.0001939       |
| <i>RANBP1</i>   | 5902      | 22         | 20105024  | 20114704  | 22     | 11      | 3.54  | 0.0001964       |
| <i>LIN7B</i>    | 64130     | 19         | 49617618  | 49621717  | 17     | 7       | 3.49  | 0.0002455       |
| <i>SEMA6D</i>   | 80031     | 15         | 47476403  | 48066420  | 1717   | 204     | 3.45  | 0.0002752       |
| <i>C3orf37</i>  | 56941     | 3          | 128997684 | 129024136 | 49     | 7       | 3.44  | 0.0002921       |
| <i>PJA2</i>     | 9867      | 5          | 108670410 | 108745675 | 242    | 28      | 3.43  | 0.0003006       |
| <i>KIF20B</i>   | 9585      | 10         | 91461367  | 91534700  | 253    | 22      | 3.41  | 0.0003215       |
| <i>KCNS1</i>    | 3787      | 20         | 43720950  | 43729753  | 14     | 9       | 3.38  | 0.0003621       |
| <i>FANCI</i>    | 55215     | 15         | 89787194  | 89860362  | 115    | 19      | 3.36  | 0.0003959       |
| <i>TLL1</i>     | 25809     | 22         | 43435522  | 43485434  | 176    | 39      | 3.33  | 0.0004371       |
| <i>CENPA</i>    | 1058      | 2          | 27008882  | 27017457  | 23     | 4       | 3.31  | 0.0004655       |
| <i>MFGE8</i>    | 4240      | 15         | 89441914  | 89456663  | 54     | 19      | 3.31  | 0.0004663       |
| <i>TMLHE</i>    | 55217     | X          | 154718672 | 154842622 | 127    | 23      | 3.28  | 0.0005137       |
| <i>MED30</i>    | 90390     | 8          | 118532965 | 118552501 | 47     | 11      | 3.22  | 0.000652        |
| <i>CTSF</i>     | 8722      | 11         | 66330935  | 66336047  | 12     | 4       | 3.20  | 0.0006931       |

**Appendix 1** to Hill MJ, Killick R, Navarrete K, et al. Knockdown of the schizophrenia susceptibility gene *TCF4* alters gene expression and proliferation of progenitor cells from the developing human neocortex. *J Psychiatry Neurosci* 2016.

DOI: 10.1503/jpn.160073

*Online appendices are unedited and posted as supplied by the authors.*

| Gene            | Entrez ID | chromosome | start     | stop      | n_snps | n_param | zstat | P-value   |
|-----------------|-----------|------------|-----------|-----------|--------|---------|-------|-----------|
| <i>PPM1G</i>    | 5496      | 2          | 27604061  | 27632496  | 28     | 6       | 3.14  | 0.0008546 |
| <i>CSE1L</i>    | 1434      | 20         | 47662838  | 47713486  | 102    | 9       | 3.12  | 0.000918  |
| <i>C10orf33</i> | 84795     | 10         | 100143322 | 100174978 | 157    | 16      | 3.06  | 0.0011093 |
| <i>ZFAND6</i>   | 54469     | 15         | 80351910  | 80430735  | 178    | 38      | 3.06  | 0.0011141 |
| <i>DIP2C</i>    | 22982     | 10         | 320130    | 735608    | 831    | 192     | 3.00  | 0.0013308 |
| <i>ATP5I</i>    | 521       | 4          | 666225    | 668127    | 2      | 2       | 2.96  | 0.0015161 |
| <i>MFAP4</i>    | 4239      | 17         | 19286755  | 19290532  | 3      | 2       | 2.96  | 0.0015169 |
| <i>SLC2A3</i>   | 6515      | 12         | 8071824   | 8088892   | 21     | 5       | 2.96  | 0.0015545 |
| <i>TMEM108</i>  | 66000     | 3          | 132757171 | 133116619 | 1100   | 160     | 2.94  | 0.001641  |
| <i>RAB2A</i>    | 5862      | 8          | 61429469  | 61536203  | 203    | 28      | 2.92  | 0.0017746 |
| <i>PCDH9</i>    | 5101      | 13         | 66876966  | 67804468  | 1986   | 378     | 2.89  | 0.0019021 |
| <i>LAMA5</i>    | 3911      | 20         | 60884121  | 60942368  | 247    | 54      | 2.85  | 0.0021977 |
| <i>PPIL5</i>    | 122769    | 14         | 50065415  | 50081390  | 42     | 5       | 2.84  | 0.0022524 |
| <i>LRSAM1</i>   | 90678     | 9          | 130213765 | 130265780 | 126    | 21      | 2.81  | 0.0025009 |
| <i>TESK1</i>    | 7016      | 9          | 35605281  | 35610038  | 5      | 5       | 2.73  | 0.0031754 |
| <i>ATP1B1</i>   | 481       | 1          | 169075947 | 169101960 | 78     | 22      | 2.66  | 0.0039292 |
| <i>RRAS</i>     | 6237      | 19         | 50138552  | 50143400  | 6      | 2       | 2.62  | 0.0044055 |
| <i>AMMECR1</i>  | 9949      | X          | 109437414 | 109683461 | 110    | 45      | 2.61  | 0.0045418 |
| <i>NRP1</i>     | 8829      | 10         | 33466419  | 33623833  | 573    | 141     | 2.57  | 0.0050441 |
| <i>PGM2L1</i>   | 283209    | 11         | 74041361  | 74109502  | 175    | 26      | 2.51  | 0.0060449 |
| <i>CELSR3</i>   | 1951      | 3          | 48673896  | 48700348  | 20     | 5       | 2.51  | 0.006046  |
| <i>CHEK1</i>    | 1111      | 11         | 125495036 | 125546150 | 115    | 21      | 2.49  | 0.0064467 |
| <i>FAM117B</i>  | 150864    | 2          | 203499901 | 203634480 | 154    | 36      | 2.47  | 0.0067011 |
| <i>PSMG1</i>    | 8624      | 21         | 40547388  | 40555440  | 30     | 9       | 2.44  | 0.0073887 |
| <i>FAM120B</i>  | 84498     | 6          | 170615844 | 170714237 | 236    | 46      | 2.44  | 0.0074346 |
| <i>HDGF</i>     | 3068      | 1          | 156711899 | 156722240 | 16     | 7       | 2.43  | 0.0074717 |
| <i>CD47</i>     | 961       | 3          | 107761941 | 107809935 | 91     | 22      | 2.41  | 0.0079708 |
| <i>FAM83D</i>   | 81610     | 20         | 37554955  | 37581703  | 59     | 11      | 2.38  | 0.0086064 |
| <i>DONSON</i>   | 29980     | 21         | 34950211  | 34961014  | 10     | 8       | 2.37  | 0.0088705 |
| <i>PPP3R1</i>   | 5534      | 2          | 68405989  | 68479651  | 133    | 10      | 2.37  | 0.0089403 |
| <i>UHRF1</i>    | 29128     | 19         | 4909510   | 4962165   | 137    | 47      | 2.34  | 0.0096975 |
| <i>FEZ1</i>     | 9638      | 11         | 125315641 | 125366206 | 110    | 27      | 2.33  | 0.0098772 |
| <i>C4orf34</i>  | 201895    | 4          | 39552550  | 39640481  | 195    | 55      | 2.33  | 0.010012  |
| <i>SFRS4</i>    | 6429      | 1          | 29474250  | 29508637  | 59     | 12      | 2.30  | 0.010631  |
| <i>IGFBP5</i>   | 3488      | 2          | 217536828 | 217560272 | 35     | 6       | 2.30  | 0.010647  |
| <i>C9orf7</i>   | 11094     | 9          | 136325087 | 136335909 | 28     | 7       | 2.30  | 0.010801  |
| <i>SPHK2</i>    | 56848     | 19         | 49122548  | 49133662  | 12     | 6       | 2.30  | 0.010845  |
| <i>HNRNPAB</i>  | 3182      | 5          | 177631508 | 177638184 | 13     | 8       | 2.25  | 0.012108  |
| <i>RHBDD1</i>   | 84236     | 2          | 227700671 | 227863926 | 263    | 22      | 2.25  | 0.012175  |
| <i>OSGIN2</i>   | 734       | 8          | 90914096  | 90940096  | 46     | 12      | 2.25  | 0.012234  |
| <i>CENPK</i>    | 64105     | 5          | 64813593  | 64858995  | 134    | 10      | 2.23  | 0.012826  |
| <i>PCDHB2</i>   | 56133     | 5          | 140474237 | 140476964 | 7      | 3       | 2.23  | 0.012923  |

**Appendix 1** to Hill MJ, Killick R, Navarrete K, et al. Knockdown of the schizophrenia susceptibility gene *TCF4* alters gene expression and proliferation of progenitor cells from the developing human neocortex. *J Psychiatry Neurosci* 2016.

DOI: 10.1503/jpn.160073

*Online appendices are unedited and posted as supplied by the authors.*

| Gene           | Entrez ID | chromosome | start     | stop      | n_snps | n_param | zstat | P-value  |
|----------------|-----------|------------|-----------|-----------|--------|---------|-------|----------|
| <i>DIP2B</i>   | 57609     | 12         | 50898768  | 51142450  | 373    | 36      | 2.23  | 0.012941 |
| <i>ARMET</i>   | 7873      | 3          | 51422692  | 51426828  | 5      | 1       | 2.22  | 0.013062 |
| <i>MTIF3</i>   | 219402    | 13         | 28009776  | 28024739  | 65     | 14      | 2.21  | 0.013526 |
| <i>TPP1</i>    | 1200      | 11         | 6633997   | 6640692   | 11     | 6       | 2.20  | 0.013749 |
| <i>TMEM178</i> | 130733    | 2          | 39892638  | 39945103  | 54     | 10      | 2.20  | 0.013778 |
| <i>UBE2L6</i>  | 9246      | 11         | 57319128  | 57335803  | 41     | 10      | 2.18  | 0.014511 |
| <i>DNM1</i>    | 1759      | 9          | 130965663 | 131017527 | 96     | 26      | 2.18  | 0.014534 |
| <i>TCP1</i>    | 6950      | 6          | 160199530 | 160210735 | 29     | 7       | 2.18  | 0.014658 |
| <i>HMGB1</i>   | 3146      | 13         | 31032877  | 31040081  | 6      | 2       | 2.17  | 0.014857 |
| <i>TUSC4</i>   | 10641     | 3          | 50384919  | 50388486  | 1      | 1       | 2.17  | 0.01505  |
| <i>RND2</i>    | 8153      | 17         | 41177258  | 41184058  | 9      | 3       | 2.16  | 0.015316 |
| <i>BRCA1</i>   | 672       | 17         | 41196312  | 41277500  | 136    | 12      | 2.15  | 0.015833 |
| <i>CMIP</i>    | 80790     | 16         | 81478775  | 81745367  | 1004   | 281     | 2.10  | 0.017941 |
| <i>NOP56</i>   | 10528     | 20         | 2633254   | 2639039   | 15     | 9       | 2.09  | 0.018491 |
| <i>PDCD5</i>   | 9141      | 19         | 33072094  | 33078358  | 14     | 9       | 2.08  | 0.018813 |
| <i>TMEM63A</i> | 9725      | 1          | 226033233 | 226070420 | 102    | 20      | 2.07  | 0.019133 |
| <i>HNRNPH1</i> | 3187      | 5          | 179041179 | 179050722 | 16     | 9       | 2.07  | 0.01931  |
| <i>NT5DC3</i>  | 51559     | 12         | 104166081 | 104234975 | 306    | 48      | 2.06  | 0.019646 |
| <i>CDYL</i>    | 9425      | 6          | 4706393   | 4955778   | 593    | 118     | 2.05  | 0.019945 |
| <i>HPS1</i>    | 3257      | 10         | 100175955 | 100206704 | 100    | 23      | 2.02  | 0.021535 |
| <i>BTBD1</i>   | 53339     | 15         | 83685175  | 83736106  | 129    | 29      | 2.01  | 0.022016 |
| <i>DRD1IP</i>  | 50632     | 10         | 135138928 | 135150475 | 18     | 7       | 1.99  | 0.023035 |
| <i>CTSB</i>    | 1508      | 8          | 11700033  | 11725646  | 139    | 33      | 1.98  | 0.023908 |
| <i>SGOL2</i>   | 151246    | 2          | 201390865 | 201448818 | 119    | 17      | 1.98  | 0.023982 |
| <i>GTF3C6</i>  | 112495    | 6          | 111279763 | 111289091 | 61     | 9       | 1.98  | 0.024055 |
| <i>C2orf25</i> | 27249     | 2          | 150426147 | 150444330 | 36     | 10      | 1.96  | 0.024957 |
| <i>CDC25C</i>  | 995       | 5          | 137620959 | 137667516 | 97     | 17      | 1.96  | 0.025194 |
| <i>SRPX2</i>   | 27286     | X          | 99899163  | 99926296  | 43     | 23      | 1.96  | 0.025233 |
| <i>IP6K1</i>   | 9807      | 3          | 49761728  | 49823973  | 82     | 13      | 1.96  | 0.025259 |
| <i>BAMBI</i>   | 25805     | 10         | 28966424  | 28971868  | 6      | 4       | 1.94  | 0.02613  |
| <i>NOVA1</i>   | 4857      | 14         | 26915089  | 27066960  | 219    | 23      | 1.92  | 0.027658 |
| <i>IFI44</i>   | 10561     | 1          | 79115477  | 79129763  | 21     | 7       | 1.91  | 0.027906 |
| <i>KIFAP3</i>  | 22920     | 1          | 169890470 | 170043879 | 409    | 37      | 1.91  | 0.027912 |
| <i>CDC45</i>   | 8318      | 22         | 19467414  | 19508135  | 103    | 19      | 1.91  | 0.028153 |
| <i>TMEM194</i> |           |            |           |           |        |         |       |          |
| A              | 23306     | 12         | 57449426  | 57472574  | 31     | 10      | 1.89  | 0.0296   |
| <i>AMT</i>     | 275       | 3          | 49454211  | 49460111  | 9      | 3       | 1.89  | 0.029633 |
| <i>CENPE</i>   | 1062      | 4          | 104026963 | 104119566 | 168    | 19      | 1.88  | 0.029778 |
| <i>CEP55</i>   | 55165     | 10         | 95256369  | 95288849  | 121    | 20      | 1.88  | 0.029956 |
| <i>CDKN2A</i>  | 1029      | 9          | 21967751  | 21994490  | 32     | 11      | 1.88  | 0.030021 |
| <i>NUP88</i>   | 4927      | 17         | 5289346   | 5323059   | 162    | 12      | 1.88  | 0.030039 |
| <i>CHRNA1</i>  | 1134      | 2          | 175612320 | 175629200 | 42     | 9       | 1.87  | 0.030843 |

**Appendix 1** to Hill MJ, Killick R, Navarrete K, et al. Knockdown of the schizophrenia susceptibility gene *TCF4* alters gene expression and proliferation of progenitor cells from the developing human neocortex. *J Psychiatry Neurosci* 2016.

DOI: 10.1503/jpn.160073

*Online appendices are unedited and posted as supplied by the authors.*

| Gene            | Entrez ID | chromosome | start     | stop      | n_snps | n_param | zstat | P-value  |
|-----------------|-----------|------------|-----------|-----------|--------|---------|-------|----------|
| <i>ITGAE</i>    | 3682      | 17         | 3617919   | 3704537   | 228    | 57      | 1.84  | 0.032751 |
| <i>CCT6A</i>    | 908       | 7          | 56119378  | 56131682  | 29     | 11      | 1.82  | 0.034509 |
| <i>CPT1C</i>    | 126129    | 19         | 50194365  | 50216988  | 68     | 12      | 1.81  | 0.03509  |
| <i>HSD11B1L</i> | 374875    | 19         | 5681035   | 5688533   | 7      | 6       | 1.80  | 0.035865 |
| <i>XRCC6</i>    | 2547      | 22         | 42017295  | 42060052  | 59     | 12      | 1.77  | 0.038672 |
| <i>NICN1</i>    | 84276     | 3          | 49459766  | 49466757  | 8      | 7       | 1.76  | 0.039092 |
| <i>SF3B4</i>    | 10262     | 1          | 149895209 | 149900144 | 11     | 2       | 1.76  | 0.039306 |
| <i>FAM3C</i>    | 10447     | 7          | 120988905 | 121036422 | 87     | 5       | 1.75  | 0.040425 |
| <i>RNMT</i>     | 8731      | 18         | 13726704  | 13764554  | 97     | 16      | 1.74  | 0.041147 |
| <i>PHF5A</i>    | 84844     | 22         | 41855721  | 41864708  | 11     | 2       | 1.73  | 0.041691 |
| <i>CDT1</i>     | 81620     | 16         | 88870186  | 88875666  | 15     | 8       | 1.73  | 0.042158 |
| <i>PNPLA7</i>   | 375775    | 9          | 140354405 | 140444986 | 28     | 6       | 1.71  | 0.043797 |
| <i>DEF8</i>     | 54849     | 16         | 90015139  | 90034468  | 86     | 26      | 1.71  | 0.043918 |
| <i>KIF23</i>    | 9493      | 15         | 69706627  | 69740764  | 24     | 4       | 1.68  | 0.046044 |
| <i>INTS12</i>   | 57117     | 4          | 106603784 | 106629881 | 46     | 5       | 1.66  | 0.048372 |
| <i>NPAL3</i>    | 57185     | 1          | 24742245  | 24799473  | 150    | 23      | 1.65  | 0.049799 |
| <i>CSNK1E</i>   | 1454      | 22         | 38686697  | 38714089  | 31     | 11      | 1.64  | 0.050636 |
| <i>SAAL1</i>    | 113174    | 11         | 18101890  | 18127638  | 85     | 6       | 1.64  | 0.050806 |
| <i>SAFB2</i>    | 9667      | 19         | 5587010   | 5622938   | 81     | 20      | 1.61  | 0.053615 |
| <i>ORC6L</i>    | 23594     | 16         | 46723558  | 46732306  | 4      | 3       | 1.60  | 0.054671 |
| <i>C18orf55</i> | 29090     | 18         | 71815746  | 71826204  | 43     | 5       | 1.60  | 0.055155 |
| <i>SRPK1</i>    | 6732      | 6          | 35800811  | 35888957  | 182    | 12      | 1.59  | 0.056063 |
| <i>MTHFD2</i>   | 10797     | 2          | 74425690  | 74442425  | 23     | 7       | 1.57  | 0.058228 |
| <i>C11orf87</i> | 399947    | 11         | 109292846 | 109299893 | 4      | 3       | 1.57  | 0.058283 |
| <i>TMEM4</i>    | 10330     | 12         | 56704212  | 56710128  | 4      | 2       | 1.57  | 0.058331 |
| <i>PLEKHG1</i>  | 57480     | 6          | 150920999 | 151164799 | 868    | 161     | 1.56  | 0.059496 |
| <i>DACT3</i>    | 147906    | 19         | 47150869  | 47164395  | 13     | 6       | 1.56  | 0.059824 |
| <i>SRI</i>      | 6717      | 7          | 87834432  | 87856308  | 33     | 13      | 1.55  | 0.060481 |
| <i>RBBP8</i>    | 5932      | 18         | 20513295  | 20606449  | 183    | 17      | 1.54  | 0.061942 |
| <i>SMARCD3</i>  | 6604      | 7          | 150936059 | 150974231 | 97     | 28      | 1.53  | 0.062594 |
| <i>MELK</i>     | 9833      | 9          | 36572905  | 36677679  | 135    | 25      | 1.53  | 0.0631   |
| <i>PALM</i>     | 5064      | 19         | 708953    | 748330    | 7      | 5       | 1.52  | 0.063798 |
| <i>TIA1</i>     | 7072      | 2          | 70436576  | 70475779  | 65     | 5       | 1.48  | 0.068836 |
| <i>FBXO31</i>   | 79791     | 16         | 87362942  | 87425708  | 175    | 47      | 1.48  | 0.069691 |
| <i>RABL4</i>    | 11020     | 22         | 37154246  | 37172172  | 32     | 4       | 1.46  | 0.071563 |
| <i>NEIL2</i>    | 252969    | 8          | 11627172  | 11644854  | 100    | 25      | 1.46  | 0.071695 |
| <i>ANLN</i>     | 54443     | 7          | 36429432  | 36493400  | 177    | 26      | 1.46  | 0.072244 |
| <i>FAM181B</i>  | 220382    | 11         | 82443046  | 82444906  | 6      | 4       | 1.46  | 0.072278 |
| <i>FEN1</i>     | 2237      | 11         | 61560109  | 61564716  | 3      | 3       | 1.45  | 0.073036 |
| <i>PLEKHB1</i>  | 58473     | 11         | 73357223  | 73373864  | 56     | 17      | 1.42  | 0.07796  |
| <i>SLC16A14</i> | 151473    | 2          | 230899690 | 230933715 | 116    | 31      | 1.40  | 0.081271 |
| <i>SLC6A9</i>   | 6536      | 1          | 44462155  | 44497134  | 56     | 19      | 1.39  | 0.082596 |



**Appendix 1** to Hill MJ, Killick R, Navarrete K, et al. Knockdown of the schizophrenia susceptibility gene *TCF4* alters gene expression and proliferation of progenitor cells from the developing human neocortex. *J Psychiatry Neurosci* 2016.

DOI: 10.1503/jpn.160073

*Online appendices are unedited and posted as supplied by the authors.*

| Gene           | Entrez ID | chromosome | start     | stop      | n_snps | n_param | zstat | P-value  |
|----------------|-----------|------------|-----------|-----------|--------|---------|-------|----------|
| <i>C21orf7</i> | 56911     | 21         | 30452873  | 30548204  | 308    | 33      | 1.38  | 0.083369 |
| <i>NUF2</i>    | 83540     | 1          | 163291723 | 163325553 | 126    | 11      | 1.37  | 0.084712 |
| <i>TMED1</i>   | 11018     | 19         | 10943114  | 10946983  | 4      | 4       | 1.37  | 0.085036 |
| <i>SHMT1</i>   | 6470      | 17         | 18231187  | 18266856  | 94     | 16      | 1.37  | 0.085969 |
| <i>CTNNAL1</i> | 8727      | 9          | 111704851 | 111775764 | 206    | 43      | 1.36  | 0.086307 |
| <i>FAM129A</i> | 116496    | 1          | 184760166 | 184943682 | 358    | 60      | 1.35  | 0.088494 |
| <i>PRKAG2</i>  | 51422     | 7          | 151253200 | 151574316 | 899    | 228     | 1.35  | 0.088601 |
| <i>CDK2</i>    | 1017      | 12         | 56360556  | 56366568  | 6      | 5       | 1.35  | 0.089111 |
| <i>LAPTM4B</i> | 55353     | 8          | 98787809  | 98864830  | 384    | 51      | 1.34  | 0.089646 |
| <i>TAF10</i>   | 6881      | 11         | 6632048   | 6633475   | 3      | 3       | 1.34  | 0.090781 |
| <i>OCIAD2</i>  | 132299    | 4          | 48887405  | 48908815  | 23     | 6       | 1.34  | 0.090851 |
| <i>EXOSC9</i>  | 5393      | 4          | 122722472 | 122738176 | 30     | 6       | 1.34  | 0.090861 |
| <i>MTDH</i>    | 92140     | 8          | 98656407  | 98742488  | 134    | 14      | 1.32  | 0.093381 |
| <i>SEZ6L2</i>  | 26470     | 16         | 29882480  | 29910580  | 15     | 6       | 1.31  | 0.095866 |
| <i>JOSD2</i>   | 126119    | 19         | 51009259  | 51014345  | 11     | 7       | 1.31  | 0.095917 |
| <i>RNF34</i>   | 80196     | 12         | 121837902 | 121862155 | 55     | 4       | 1.30  | 0.0962   |
| <i>PLXNA1</i>  | 5361      | 3          | 126707437 | 126756235 | 158    | 19      | 1.29  | 0.097978 |
| <i>ECH1</i>    | 1891      | 19         | 39306062  | 39322497  | 38     | 12      | 1.28  | 0.099942 |
| <i>MXD4</i>    | 10608     | 4          | 2249160   | 2263739   | 33     | 5       | 1.27  | 0.1013   |
| <i>PSMC3IP</i> | 29893     | 17         | 40724329  | 40729747  | 4      | 1       | 1.27  | 0.10149  |
| <i>CCNA2</i>   | 890       | 4          | 122737599 | 122745088 | 17     | 8       | 1.27  | 0.10227  |
| <i>C1GALT1</i> | 56913     | 7          | 7222246   | 7288251   | 352    | 38      | 1.26  | 0.10411  |
| <i>MLF1IP</i>  | 79682     | 4          | 185615219 | 185655286 | 259    | 12      | 1.25  | 0.10587  |
| <i>IFI35</i>   | 3430      | 17         | 41158742  | 41166476  | 14     | 5       | 1.25  | 0.10612  |
| <i>ZBTB4</i>   | 57659     | 17         | 7362685   | 7387568   | 56     | 19      | 1.24  | 0.10669  |
| <i>GXYLT1</i>  | 283464    | 12         | 42475647  | 42538673  | 136    | 24      | 1.24  | 0.10693  |
| <i>WBP2</i>    | 23558     | 17         | 73841780  | 73851501  | 18     | 9       | 1.23  | 0.10857  |
| <i>LEMD1</i>   | 93273     | 1          | 205350506 | 205391214 | 128    | 29      | 1.23  | 0.10898  |
| <i>SIGMAR1</i> | 10280     | 9          | 34634719  | 34637768  | 6      | 4       | 1.23  | 0.11009  |
| <i>BIRC5</i>   | 332       | 17         | 76210277  | 76221716  | 62     | 10      | 1.22  | 0.11121  |
| <i>LASS2</i>   | 29956     | 1          | 150937649 | 150947440 | 23     | 9       | 1.21  | 0.11296  |
| <i>GATS</i>    | 352954    | 7          | 99798276  | 99869855  | 131    | 29      | 1.19  | 0.11622  |
| <i>SRRM1</i>   | 10250     | 1          | 24969594  | 24999772  | 23     | 9       | 1.17  | 0.12084  |
| <i>CGNL1</i>   | 84952     | 15         | 57730183  | 57842921  | 425    | 143     | 1.16  | 0.12317  |
| <i>RASL10A</i> | 10633     | 22         | 29708922  | 29711748  | 6      | 6       | 1.16  | 0.12371  |
| <i>KDEL3</i>   | 11015     | 22         | 38864083  | 38879445  | 14     | 8       | 1.16  | 0.12397  |
| <i>LRRC58</i>  | 116064    | 3          | 120043576 | 120068186 | 68     | 13      | 1.15  | 0.12601  |
| <i>HEY1</i>    | 23462     | 8          | 80676245  | 80680098  | 8      | 7       | 1.13  | 0.12889  |
| <i>MYO19</i>   | 80179     | 17         | 34851599  | 34891305  | 63     | 8       | 1.13  | 0.12901  |
| <i>TUBGCP5</i> | 114791    | 15         | 22833395  | 22873891  | 76     | 7       | 1.13  | 0.12933  |
| <i>C2orf40</i> | 84417     | 2          | 106682113 | 106694611 | 34     | 15      | 1.11  | 0.13379  |
| <i>DAB2</i>    | 1601      | 5          | 39371780  | 39425335  | 163    | 23      | 1.10  | 0.13502  |

**Appendix 1** to Hill MJ, Killick R, Navarrete K, et al. Knockdown of the schizophrenia susceptibility gene *TCF4* alters gene expression and proliferation of progenitor cells from the developing human neocortex. *J Psychiatry Neurosci* 2016.

DOI: 10.1503/jpn.160073

*Online appendices are unedited and posted as supplied by the authors.*

| Gene            | Entrez ID | chromosome | start     | stop      | n_snps | n_param | zstat | P-value |
|-----------------|-----------|------------|-----------|-----------|--------|---------|-------|---------|
| <i>CST6</i>     | 1474      | 11         | 65779462  | 65780976  | 2      | 2       | 1.09  | 0.13753 |
| <i>DDX10</i>    | 1662      | 11         | 108535816 | 108811650 | 421    | 35      | 1.09  | 0.13774 |
| <i>KIAA2013</i> | 90231     | 1          | 11979645  | 11986485  | 21     | 8       | 1.08  | 0.14088 |
| <i>RGS16</i>    | 6004      | 1          | 182567758 | 182573548 | 9      | 5       | 1.07  | 0.14124 |
| <i>EDA2R</i>    | 60401     | X          | 65815479  | 65859140  | 25     | 12      | 1.07  | 0.14203 |
| <i>H2AFX</i>    | 3014      | 11         | 118964584 | 118966177 | 3      | 2       | 1.07  | 0.14287 |
| <i>CFLAR</i>    | 8837      | 2          | 201980877 | 202037411 | 119    | 17      | 1.07  | 0.14325 |
| <i>ADA</i>      | 100       | 20         | 43248163  | 43280376  | 77     | 25      | 1.06  | 0.14422 |
| <i>GP1BA</i>    | 2811      | 17         | 4835592   | 4838325   | 6      | 6       | 1.05  | 0.14659 |
| <i>GGA1</i>     | 26088     | 22         | 38004481  | 38029571  | 30     | 10      | 1.04  | 0.14838 |
| <i>EXOC6</i>    | 54536     | 10         | 94594470  | 94819251  | 536    | 48      | 1.04  | 0.14943 |
| <i>CHI3L2</i>   | 1117      | 1          | 111770281 | 111786062 | 67     | 10      | 1.04  | 0.15008 |
| <i>CLUAP1</i>   | 23059     | 16         | 3550963   | 3587669   | 69     | 20      | 1.03  | 0.15141 |
| <i>ACADM</i>    | 34        | 1          | 76190043  | 76229355  | 139    | 12      | 1.03  | 0.15149 |
| <i>C7orf57</i>  | 136288    | 7          | 48075117  | 48100894  | 75     | 11      | 1.02  | 0.1533  |
| <i>TRIM24</i>   | 8805      | 7          | 138145079 | 138270333 | 165    | 26      | 1.02  | 0.15349 |
| <i>RAB6A</i>    | 5870      | 11         | 73386683  | 73472201  | 230    | 38      | 1.02  | 0.15438 |
| <i>DNAL4</i>    | 10126     | 22         | 39174513  | 39190161  | 25     | 10      | 1.01  | 0.15663 |
| <i>WRB</i>      | 7485      | 21         | 40752213  | 40769815  | 31     | 10      | 1.00  | 0.15768 |
| <i>LSM5</i>     | 23658     | 7          | 32524945  | 32534870  | 39     | 7       | 0.99  | 0.16151 |
| <i>C9orf127</i> | 51754     | 9          | 35829222  | 35854844  | 40     | 12      | 0.99  | 0.16176 |
| <i>ZWINT</i>    | 11130     | 10         | 58117199  | 58121034  | 6      | 3       | 0.99  | 0.16206 |
| <i>ACCS</i>     | 84680     | 11         | 44087729  | 44105569  | 58     | 19      | 0.97  | 0.16484 |
| <i>OSGEPL1</i>  | 64172     | 2          | 190611386 | 190627924 | 20     | 7       | 0.96  | 0.16887 |
| <i>SCAP</i>     | 22937     | 3          | 47455184  | 47517445  | 51     | 18      | 0.95  | 0.17116 |
| <i>RAN</i>      | 5901      | 12         | 131356617 | 131360826 | 13     | 6       | 0.94  | 0.17249 |
| <i>EFHD2</i>    | 79180     | 1          | 15736391  | 15756839  | 36     | 16      | 0.94  | 0.17335 |
| <i>CDC14B</i>   | 8555      | 9          | 99262395  | 99382112  | 65     | 23      | 0.94  | 0.17416 |
| <i>RAB4B</i>    | 53916     | 19         | 41284124  | 41302849  | 60     | 15      | 0.94  | 0.17464 |
| <i>PBK</i>      | 55872     | 8          | 27667138  | 27695349  | 147    | 8       | 0.92  | 0.17776 |
| <i>CHTF18</i>   | 63922     | 16         | 838622    | 848074    | 26     | 5       | 0.92  | 0.17825 |
| <i>ORMDL1</i>   | 94101     | 2          | 190634993 | 190649097 | 30     | 6       | 0.92  | 0.17838 |
| <i>C13orf27</i> | 93081     | 13         | 103418460 | 103426149 | 16     | 10      | 0.91  | 0.18156 |
| <i>DHRS7</i>    | 51635     | 14         | 60611496  | 60632211  | 57     | 4       | 0.91  | 0.1819  |
| <i>ASPM</i>     | 259266    | 1          | 197053257 | 197115824 | 88     | 7       | 0.90  | 0.18438 |
| <i>FRZB</i>     | 2487      | 2          | 183698002 | 183731498 | 92     | 18      | 0.89  | 0.1867  |
| <i>ACTRT1</i>   | 139741    | X          | 127184941 | 127186382 | 2      | 2       | 0.88  | 0.18826 |
| <i>MTRF1L</i>   | 54516     | 6          | 153308400 | 153323925 | 47     | 12      | 0.88  | 0.18831 |
| <i>OPRL1</i>    | 4987      | 20         | 62711471  | 62731996  | 37     | 19      | 0.88  | 0.1884  |
| <i>MAD2L1</i>   | 4085      | 4          | 120980577 | 120988013 | 22     | 7       | 0.88  | 0.18845 |
| <i>OSBPL7</i>   | 114881    | 17         | 45884733  | 45899147  | 48     | 14      | 0.88  | 0.19027 |
| <i>SLC15A3</i>  | 51296     | 11         | 60704555  | 60719257  | 35     | 12      | 0.87  | 0.19234 |

**Appendix 1** to Hill MJ, Killick R, Navarrete K, et al. Knockdown of the schizophrenia susceptibility gene *TCF4* alters gene expression and proliferation of progenitor cells from the developing human neocortex. *J Psychiatry Neurosci* 2016.

DOI: 10.1503/jpn.160073

*Online appendices are unedited and posted as supplied by the authors.*

| Gene            | Entrez ID | chromosome | start     | stop      | n_snps | n_param | zstat | P-value |
|-----------------|-----------|------------|-----------|-----------|--------|---------|-------|---------|
| <i>MED14</i>    | 9282      | X          | 40508795  | 40594804  | 89     | 19      | 0.86  | 0.19377 |
| <i>PTBP1</i>    | 5725      | 19         | 797392    | 812327    | 29     | 7       | 0.86  | 0.19464 |
| <i>EFNB3</i>    | 1949      | 17         | 7608520   | 7614693   | 9      | 4       | 0.86  | 0.19485 |
| <i>MAP6</i>     | 4135      | 11         | 75297963  | 75379479  | 136    | 22      | 0.86  | 0.19583 |
| <i>SERPINF1</i> | 5176      | 17         | 1665259   | 1680859   | 61     | 8       | 0.86  | 0.19595 |
| <i>BOC</i>      | 91653     | 3          | 112931375 | 113006306 | 223    | 60      | 0.84  | 0.20074 |
| <i>SOX4</i>     | 6659      | 6          | 21593972  | 21598850  | 1      | 1       | 0.84  | 0.2008  |
| <i>SEZ6</i>     | 124925    | 17         | 27281923  | 27333081  | 55     | 17      | 0.84  | 0.20116 |
| <i>APBB3</i>    | 10307     | 5          | 139937853 | 139944189 | 4      | 3       | 0.82  | 0.20696 |
| <i>CCNE2</i>    | 9134      | 8          | 95892452  | 95907482  | 36     | 9       | 0.81  | 0.20881 |
| <i>KIF2C</i>    | 11004     | 1          | 45205490  | 45233439  | 54     | 11      | 0.81  | 0.20983 |
| <i>FAM134B</i>  | 54463     | 5          | 16473147  | 16617118  | 419    | 95      | 0.79  | 0.2159  |
| <i>COL9A2</i>   | 1298      | 1          | 40766163  | 40782939  | 58     | 15      | 0.78  | 0.2163  |
| <i>FREM2</i>    | 341640    | 13         | 39261173  | 39461268  | 476    | 78      | 0.78  | 0.21657 |
| <i>NME7</i>     | 29922     | 1          | 169101769 | 169337186 | 833    | 81      | 0.78  | 0.2183  |
| <i>SIDT2</i>    | 51092     | 11         | 117049939 | 117068161 | 49     | 9       | 0.77  | 0.22142 |
| <i>MBNL1</i>    | 4154      | 3          | 151985829 | 152183569 | 290    | 53      | 0.76  | 0.22336 |
| <i>BCL6</i>     | 604       | 3          | 187439165 | 187463513 | 63     | 19      | 0.75  | 0.22607 |
| <i>NTS</i>      | 4922      | 12         | 86268073  | 86276770  | 23     | 8       | 0.75  | 0.22669 |
| <i>NAV2</i>     | 89797     | 11         | 19372271  | 20143147  | 2047   | 467     | 0.74  | 0.22922 |
| <i>RGS4</i>     | 5999      | 1          | 163038396 | 163046592 | 13     | 8       | 0.72  | 0.2356  |
| <i>HSPH1</i>    | 10808     | 13         | 31710762  | 31736117  | 52     | 7       | 0.72  | 0.23592 |
| <i>PLP1</i>     | 5354      | X          | 103031439 | 103047548 | 15     | 9       | 0.71  | 0.23819 |
| <i>VRK3</i>     | 51231     | 19         | 50479724  | 50528805  | 125    | 15      | 0.71  | 0.23854 |
| <i>TM2D1</i>    | 83941     | 1          | 62146719  | 62191095  | 89     | 17      | 0.71  | 0.23858 |
| <i>MEF2D</i>    | 4209      | 1          | 156433519 | 156470529 | 54     | 11      | 0.70  | 0.24227 |
| <i>GAL3ST4</i>  | 79690     | 7          | 99756865  | 99766373  | 12     | 5       | 0.69  | 0.24532 |
| <i>GPR56</i>    | 9289      | 16         | 57653910  | 57698944  | 141    | 49      | 0.69  | 0.24641 |
| <i>LPPR4</i>    | 9890      | 1          | 99729848  | 99775140  | 107    | 25      | 0.68  | 0.24944 |
| <i>DEAF1</i>    | 10522     | 11         | 644225    | 695740    | 169    | 24      | 0.67  | 0.25263 |
| <i>BCAP29</i>   | 55973     | 7          | 107220422 | 107263762 | 58     | 9       | 0.67  | 0.2529  |
| <i>HNRNPM</i>   | 4670      | 19         | 8509803   | 8553998   | 122    | 16      | 0.66  | 0.25492 |
| <i>NFXL1</i>    | 152518    | 4          | 47849257  | 47916633  | 161    | 20      | 0.65  | 0.25897 |
| <i>COTL1</i>    | 23406     | 16         | 84599202  | 84651669  | 209    | 54      | 0.62  | 0.26638 |
| <i>GYG2</i>     | 8908      | X          | 2746863   | 2800861   | 176    | 37      | 0.62  | 0.26899 |
| <i>ABR</i>      | 29        | 17         | 906759    | 1090616   | 361    | 93      | 0.61  | 0.26935 |
| <i>FHDC1</i>    | 85462     | 4          | 153864135 | 153900848 | 63     | 29      | 0.61  | 0.271   |
| <i>ODC1</i>     | 4953      | 2          | 10580508  | 10588453  | 15     | 5       | 0.61  | 0.27177 |
| <i>KIF20A</i>   | 10112     | 5          | 137514417 | 137523404 | 10     | 7       | 0.59  | 0.27661 |
| <i>GPC2</i>     | 221914    | 7          | 99767229  | 99774990  | 7      | 6       | 0.59  | 0.27863 |
| <i>SRM</i>      | 6723      | 1          | 11114649  | 11120091  | 9      | 4       | 0.58  | 0.27957 |
| <i>SMC2</i>     | 10592     | 9          | 106856541 | 106903700 | 107    | 15      | 0.58  | 0.27967 |

**Appendix 1** to Hill MJ, Killick R, Navarrete K, et al. Knockdown of the schizophrenia susceptibility gene *TCF4* alters gene expression and proliferation of progenitor cells from the developing human neocortex. *J Psychiatry Neurosci* 2016.

DOI: 10.1503/jpn.160073

*Online appendices are unedited and posted as supplied by the authors.*

| Gene      | Entrez ID | chromosome | start     | stop      | n_snps | n_param | zstat | P-value |
|-----------|-----------|------------|-----------|-----------|--------|---------|-------|---------|
| FAM96B    | 51647     | 16         | 66965958  | 66968320  | 3      | 3       | 0.58  | 0.28042 |
| SLC22A18  | 5002      | 11         | 2920951   | 2946476   | 87     | 37      | 0.58  | 0.28164 |
| FANCD2    | 2177      | 3          | 10068113  | 10143614  | 182    | 15      | 0.57  | 0.28555 |
| MRPL3     | 11222     | 3          | 131181045 | 131221860 | 78     | 10      | 0.57  | 0.28564 |
| FLJ35258  | 284297    | 19         | 55999870  | 56030466  | 103    | 30      | 0.55  | 0.28946 |
| RNASET2   | 8635      | 6          | 167343004 | 167370077 | 78     | 29      | 0.54  | 0.29588 |
| TMEM54    | 113452    | 1          | 33360196  | 33366953  | 7      | 3       | 0.53  | 0.29792 |
| CRTC3     | 64784     | 15         | 91073198  | 91188577  | 295    | 49      | 0.52  | 0.30012 |
| HDC       | 3067      | 15         | 50534144  | 50558162  | 53     | 20      | 0.51  | 0.30395 |
| LIG1      | 3978      | 19         | 48618703  | 48673560  | 221    | 23      | 0.49  | 0.31235 |
| UBE2C     | 11065     | 20         | 44441255  | 44445596  | 6      | 5       | 0.49  | 0.31323 |
| NACAD     | 23148     | 7          | 45120036  | 45128493  | 23     | 9       | 0.47  | 0.31916 |
| NCALD     | 83988     | 8          | 102698770 | 103137135 | 1229   | 180     | 0.47  | 0.3202  |
| TFAP2C    | 7022      | 20         | 55204358  | 55214339  | 10     | 6       | 0.44  | 0.32844 |
| GAD1      | 2571      | 2          | 171673200 | 171717661 | 101    | 22      | 0.43  | 0.33207 |
| SPC24     | 147841    | 19         | 11257831  | 11266484  | 37     | 12      | 0.43  | 0.3334  |
| BLVRB     | 645       | 19         | 40953691  | 40971725  | 47     | 13      | 0.43  | 0.33364 |
| FAM111A   | 63901     | 11         | 58910318  | 58922512  | 17     | 10      | 0.43  | 0.33368 |
| ZKSCAN1   | 7586      | 7          | 99613219  | 99635403  | 36     | 14      | 0.42  | 0.3381  |
| PTPN2     | 5771      | 18         | 12785477  | 12884334  | 233    | 53      | 0.42  | 0.33846 |
| ATAD2     | 29028     | 8          | 124332090 | 124408705 | 48     | 22      | 0.40  | 0.34353 |
| NOP58     | 51602     | 2          | 203130515 | 203168384 | 68     | 15      | 0.39  | 0.3478  |
| TMEM141   | 85014     | 9          | 139685777 | 139687769 | 6      | 4       | 0.39  | 0.34899 |
| APOD      | 347       | 3          | 195295573 | 195311076 | 3      | 1       | 0.38  | 0.35101 |
| BEND5     | 79656     | 1          | 49193539  | 49242547  | 72     | 19      | 0.38  | 0.35146 |
| ADAM19    | 8728      | 5          | 156904312 | 157002783 | 330    | 73      | 0.38  | 0.35293 |
| MMP11     | 4320      | 22         | 24115036  | 24126503  | 17     | 6       | 0.38  | 0.35339 |
| KLHDC9    | 126823    | 1          | 161068151 | 161070138 | 4      | 4       | 0.37  | 0.35405 |
| PIF1      | 80119     | 15         | 65107831  | 65117838  | 35     | 10      | 0.35  | 0.36417 |
| TPST2     | 8459      | 22         | 26921714  | 26986089  | 261    | 71      | 0.35  | 0.36462 |
| ZWILCH    | 55055     | 15         | 66797431  | 66841823  | 134    | 23      | 0.34  | 0.36556 |
| ZFPM1     | 161882    | 16         | 88520014  | 88601574  | 134    | 17      | 0.34  | 0.36773 |
| KLF9      | 687       | 9          | 72999513  | 73029573  | 41     | 21      | 0.33  | 0.37036 |
| IGSF3     | 3321      | 1          | 117117031 | 117210314 | 58     | 20      | 0.33  | 0.37064 |
| SSBP1     | 6742      | 7          | 141438176 | 141450257 | 15     | 5       | 0.32  | 0.37485 |
| KPNB1     | 3837      | 17         | 45727275  | 45761004  | 43     | 11      | 0.32  | 0.37527 |
| C4orf48   | 401115    | 4          | 2043720   | 2045697   | 3      | 3       | 0.32  | 0.37537 |
| C14orf106 | 55320     | 14         | 45672393  | 45722605  | 63     | 7       | 0.32  | 0.37622 |
| CETN2     | 1069      | X          | 151995871 | 151999301 | 4      | 3       | 0.31  | 0.37809 |
| RAD21     | 5885      | 8          | 117858173 | 117887105 | 70     | 9       | 0.30  | 0.38027 |
| TYMS      | 7298      | 18         | 657604    | 673499    | 58     | 9       | 0.30  | 0.38226 |
| XPC       | 7508      | 3          | 14186647  | 14220172  | 78     | 21      | 0.29  | 0.38584 |

**Appendix 1** to Hill MJ, Killick R, Navarrete K, et al. Knockdown of the schizophrenia susceptibility gene *TCF4* alters gene expression and proliferation of progenitor cells from the developing human neocortex. *J Psychiatry Neurosci* 2016.

DOI: 10.1503/jpn.160073

*Online appendices are unedited and posted as supplied by the authors.*

| Gene      | Entrez ID | chromosome | start     | stop      | n_snps | n_param | zstat | P-value |
|-----------|-----------|------------|-----------|-----------|--------|---------|-------|---------|
| JARID2    | 3720      | 6          | 15246527  | 15522253  | 686    | 170     | 0.29  | 0.38685 |
| MCM4      | 4173      | 8          | 48872763  | 48890720  | 7      | 3       | 0.28  | 0.38913 |
| LEFTY2    | 7044      | 1          | 226124298 | 226129083 | 6      | 4       | 0.27  | 0.39334 |
| SFRS1     | 6426      | 17         | 56078280  | 56084707  | 7      | 5       | 0.26  | 0.39628 |
| VASH1     | 22846     | 14         | 77228235  | 77249363  | 50     | 21      | 0.26  | 0.39685 |
| ELOVL6    | 79071     | 4          | 110970229 | 111119820 | 489    | 139     | 0.26  | 0.39739 |
| CLK1      | 1195      | 2          | 201717732 | 201729467 | 19     | 8       | 0.26  | 0.39782 |
| CHKB      | 1120      | 22         | 51017387  | 51021428  | 17     | 8       | 0.26  | 0.39846 |
| POFUT2    | 23275     | 21         | 46683843  | 46707811  | 68     | 21      | 0.26  | 0.3993  |
| MANBAL    | 63905     | 20         | 35918051  | 35945663  | 34     | 8       | 0.25  | 0.39992 |
| C14orf173 | 64423     | 14         | 105155943 | 105185947 | 58     | 11      | 0.25  | 0.40018 |
| CRYL1     | 51084     | 13         | 20977806  | 21100012  | 403    | 65      | 0.25  | 0.4027  |
| SALL2     | 6297      | 14         | 21989231  | 22005337  | 22     | 9       | 0.24  | 0.40376 |
| CKS2      | 1164      | 9          | 91926113  | 91931618  | 16     | 9       | 0.24  | 0.40411 |
| TSTD1     | 1E+08     | 1          | 161007421 | 161008774 | 2      | 2       | 0.24  | 0.40529 |
| ID1       | 3397      | 20         | 30193092  | 30194313  | 4      | 2       | 0.24  | 0.40611 |
| DLGAP5    | 9787      | 14         | 55614834  | 55658396  | 112    | 12      | 0.24  | 0.40707 |
| ERMP1     | 79956     | 9          | 5784572   | 5833081   | 108    | 25      | 0.23  | 0.40893 |
| PSPC1     | 55269     | 13         | 20248896  | 20357083  | 157    | 13      | 0.21  | 0.41547 |
| TTYH1     | 57348     | 19         | 54926605  | 54947899  | 65     | 18      | 0.21  | 0.41711 |
| DKK1      | 22943     | 10         | 54074041  | 54077417  | 6      | 4       | 0.20  | 0.422   |
| DUT       | 1854      | 15         | 48623621  | 48635570  | 8      | 4       | 0.19  | 0.42509 |
| GOLGA8B   | 440270    | 15         | 34817483  | 34875771  | 92     | 22      | 0.19  | 0.42536 |
| MCAT      | 27349     | 22         | 43528212  | 43539403  | 24     | 9       | 0.18  | 0.42699 |
| PM20D2    | 135293    | 6          | 89855769  | 89875284  | 46     | 11      | 0.18  | 0.42845 |
| BNIP3     | 664       | 10         | 133781204 | 133795435 | 25     | 8       | 0.17  | 0.43094 |
| CCDC86    | 79080     | 11         | 60609429  | 60618561  | 32     | 16      | 0.17  | 0.43385 |
| CMTM4     | 146223    | 16         | 66648653  | 66730610  | 150    | 10      | 0.16  | 0.4346  |
| SGOL1     | 151648    | 3          | 20202085  | 20227724  | 89     | 17      | 0.16  | 0.43507 |
| SBK1      | 388228    | 16         | 28303840  | 28335170  | 24     | 9       | 0.16  | 0.43523 |
| EBNA1BP2  | 10969     | 1          | 43629845  | 43638241  | 33     | 8       | 0.16  | 0.43584 |
| HMMR      | 3161      | 5          | 162887517 | 162918951 | 76     | 18      | 0.16  | 0.4383  |
| RRM1      | 6240      | 11         | 4115924   | 4160106   | 113    | 13      | 0.14  | 0.44416 |
| PSMC6     | 5706      | 14         | 53173896  | 53194716  | 22     | 6       | 0.12  | 0.45069 |
| HMGB2     | 3148      | 4          | 174252527 | 174255595 | 6      | 3       | 0.10  | 0.45834 |
| PTMA      | 5757      | 2          | 232573235 | 232578251 | 20     | 8       | 0.09  | 0.46222 |
| RBP1      | 5947      | 3          | 139236276 | 139258671 | 56     | 18      | 0.09  | 0.46326 |
| AHCYL2    | 23382     | 7          | 128864855 | 129070052 | 371    | 69      | 0.09  | 0.46366 |
| KRTCAP2   | 200185    | 1          | 155141884 | 155145804 | 10     | 6       | 0.08  | 0.4685  |
| SNTA1     | 6640      | 20         | 31995763  | 32031698  | 43     | 9       | 0.08  | 0.46979 |
| PRPF38B   | 55119     | 1          | 109234932 | 109244425 | 6      | 6       | 0.07  | 0.47374 |
| POLD1     | 5424      | 19         | 50887593  | 50921271  | 59     | 11      | 0.06  | 0.47532 |

**Appendix 1** to Hill MJ, Killick R, Navarrete K, et al. Knockdown of the schizophrenia susceptibility gene *TCF4* alters gene expression and proliferation of progenitor cells from the developing human neocortex. *J Psychiatry Neurosci* 2016.

DOI: 10.1503/jpn.160073

*Online appendices are unedited and posted as supplied by the authors.*

| Gene            | Entrez ID | chromosome | start     | stop      | n_snps | n_param | zstat | P-value |
|-----------------|-----------|------------|-----------|-----------|--------|---------|-------|---------|
| <i>C18orf51</i> | 125704    | 18         | 72102963  | 72124503  | 56     | 20      | 0.05  | 0.47921 |
| <i>PTGES3</i>   | 10728     | 12         | 57057125  | 57082078  | 53     | 19      | 0.05  | 0.47927 |
| <i>PTGDS</i>    | 5730      | 9          | 139871956 | 139876194 | 5      | 3       | 0.05  | 0.48179 |
| <i>KIF11</i>    | 3832      | 10         | 94352825  | 94415152  | 225    | 29      | 0.04  | 0.48301 |
| <i>PNCK</i>     | 139728    | X          | 152935188 | 152939816 | 6      | 4       | 0.04  | 0.48338 |
| <i>ZNF69</i>    | 7620      | 19         | 11998670  | 12025366  | 68     | 14      | 0.04  | 0.48439 |
| <i>PRPS2</i>    | 5634      | X          | 12809474  | 12842346  | 71     | 31      | 0.03  | 0.48614 |
| <i>MTA2</i>     | 9219      | 11         | 62360675  | 62369312  | 9      | 3       | 0.03  | 0.48738 |
| <i>IGFBP7</i>   | 3490      | 4          | 57897244  | 57976539  | 416    | 94      | 0.02  | 0.4922  |
| <i>MSRB2</i>    | 22921     | 10         | 23384427  | 23410942  | 60     | 15      | 0.02  | 0.49316 |
| <i>STC1</i>     | 6781      | 8          | 23699434  | 23712320  | 28     | 11      | 0.01  | 0.49738 |
| <i>CABIN1</i>   | 23523     | 22         | 24407765  | 24574596  | 215    | 23      | -0.01 | 0.50557 |
| <i>P4HA2</i>    | 8974      | 5          | 131528303 | 131563556 | 64     | 19      | -0.01 | 0.50589 |
| <i>MICALL2</i>  | 79778     | 7          | 1473995   | 1499109   | 47     | 5       | -0.02 | 0.50616 |
| <i>ALDH3A1</i>  | 218       | 17         | 19641297  | 19651746  | 16     | 5       | -0.02 | 0.50673 |
| <i>UBE3C</i>    | 9690      | 7          | 156931655 | 157062066 | 366    | 33      | -0.03 | 0.51302 |
| <i>THY1</i>     | 7070      | 11         | 119288655 | 119294246 | 11     | 3       | -0.04 | 0.51397 |
| <i>CREG1</i>    | 8804      | 1          | 167510250 | 167523056 | 42     | 13      | -0.04 | 0.51639 |
| <i>TMEM134</i>  | 80194     | 11         | 67231819  | 67236731  | 2      | 2       | -0.07 | 0.52727 |
| <i>C3orf26</i>  | 84319     | 3          | 99536678  | 99897476  | 422    | 89      | -0.07 | 0.52857 |
| <i>CLIP3</i>    | 25999     | 19         | 36505562  | 36523797  | 23     | 11      | -0.07 | 0.52859 |
| <i>TMEM97</i>   | 27346     | 17         | 26646121  | 26655711  | 9      | 5       | -0.07 | 0.52879 |
| <i>CLIP2</i>    | 7461      | 7          | 73703805  | 73820273  | 192    | 35      | -0.07 | 0.52888 |
| <i>MKNK2</i>    | 2872      | 19         | 2037470   | 2051243   | 4      | 1       | -0.08 | 0.53251 |
| <i>LZTR1</i>    | 8216      | 22         | 21336558  | 21353326  | 29     | 11      | -0.09 | 0.53445 |
| <i>IGDCC3</i>   | 9543      | 15         | 65619465  | 65670378  | 82     | 24      | -0.11 | 0.54182 |
| <i>TACC3</i>    | 10460     | 4          | 1723266   | 1746898   | 128    | 7       | -0.11 | 0.54248 |
| <i>CBR1</i>     | 873       | 21         | 37442285  | 37445462  | 12     | 7       | -0.11 | 0.54564 |
| <i>NUP62</i>    | 23636     | 19         | 50410082  | 50432988  | 66     | 16      | -0.12 | 0.54654 |
| <i>PICK1</i>    | 9463      | 22         | 38453262  | 38471708  | 32     | 9       | -0.13 | 0.5517  |
| <i>ALDOC</i>    | 230       | 17         | 26900133  | 26903951  | 2      | 2       | -0.14 | 0.55687 |
| <i>PDZD8</i>    | 118987    | 10         | 119042606 | 119134937 | 199    | 18      | -0.17 | 0.56577 |
| <i>L3MBTL3</i>  | 84456     | 6          | 130339728 | 130462594 | 289    | 48      | -0.17 | 0.56611 |
| <i>TSPO</i>     | 706       | 22         | 43547535  | 43559248  | 33     | 11      | -0.17 | 0.56667 |
| <i>PDSS1</i>    | 23590     | 10         | 26986595  | 27035727  | 143    | 32      | -0.17 | 0.56671 |
| <i>KIAA0194</i> | 22993     | 5          | 149380169 | 149432706 | 119    | 17      | -0.17 | 0.56741 |
| <i>KCNMB2</i>   | 10242     | 3          | 178254224 | 178562217 | 925    | 140     | -0.17 | 0.56824 |
| <i>NUPR1</i>    | 26471     | 16         | 28548662  | 28550495  | 7      | 4       | -0.17 | 0.56882 |
| <i>DNASE2</i>   | 1777      | 19         | 12986025  | 12992335  | 6      | 4       | -0.18 | 0.57242 |
| <i>POLR3G</i>   | 10622     | 5          | 89770681  | 89810369  | 83     | 27      | -0.22 | 0.58819 |
| <i>PCNA</i>     | 5111      | 20         | 5095599   | 5107268   | 16     | 2       | -0.23 | 0.58926 |
| <i>PTHLH</i>    | 5744      | 12         | 28111017  | 28124916  | 42     | 13      | -0.23 | 0.58931 |

**Appendix 1** to Hill MJ, Killick R, Navarrete K, et al. Knockdown of the schizophrenia susceptibility gene *TCF4* alters gene expression and proliferation of progenitor cells from the developing human neocortex. *J Psychiatry Neurosci* 2016.

DOI: 10.1503/jpn.160073

*Online appendices are unedited and posted as supplied by the authors.*

| Gene      | Entrez ID | chromosome | start     | stop      | n_snps | n_param | zstat | P-value |
|-----------|-----------|------------|-----------|-----------|--------|---------|-------|---------|
| FAM122B   | 159090    | X          | 133903596 | 133931262 | 8      | 7       | -0.23 | 0.59082 |
| KDELC2    | 143888    | 11         | 108342833 | 108369159 | 38     | 13      | -0.23 | 0.59162 |
| ATAD3A    | 55210     | 1          | 1447523   | 1470067   | 30     | 4       | -0.23 | 0.59279 |
| RFXANK    | 8625      | 19         | 19303008  | 19312678  | 16     | 7       | -0.24 | 0.59421 |
| PMP22     | 5376      | 17         | 15133096  | 15168644  | 76     | 23      | -0.25 | 0.59681 |
| RAD51AP1  | 10635     | 12         | 4647950   | 4669213   | 25     | 7       | -0.25 | 0.59761 |
| PDGFRB    | 5159      | 5          | 149493402 | 149535422 | 110    | 32      | -0.25 | 0.59951 |
| TRO       | 7216      | X          | 54947249  | 54957864  | 8      | 3       | -0.25 | 0.59971 |
| BEX1      | 55859     | X          | 102317581 | 102319168 | 4      | 3       | -0.25 | 0.60024 |
| RRP15     | 51018     | 1          | 218458629 | 218511325 | 73     | 6       | -0.26 | 0.60341 |
| PDGFRA    | 5156      | 4          | 55095264  | 55164412  | 117    | 15      | -0.27 | 0.60553 |
| SELM      | 140606    | 22         | 31500763  | 31503551  | 6      | 3       | -0.27 | 0.60569 |
| ANXA3     | 306       | 4          | 79472742  | 79531605  | 116    | 22      | -0.27 | 0.60771 |
| DSN1      | 79980     | 20         | 35380194  | 35402230  | 13     | 12      | -0.28 | 0.61177 |
| PDCL3     | 79031     | 2          | 101179418 | 101193201 | 40     | 13      | -0.29 | 0.61496 |
| ALAD      | 210       | 9          | 116148592 | 116163618 | 32     | 16      | -0.31 | 0.62056 |
| POLQ      | 10721     | 3          | 121150273 | 121264853 | 211    | 39      | -0.31 | 0.62066 |
| EIF5A     | 1984      | 17         | 7210318   | 7215782   | 12     | 7       | -0.32 | 0.62402 |
| MCM5      | 4174      | 22         | 35796116  | 35820495  | 64     | 18      | -0.32 | 0.62438 |
| MYL9      | 10398     | 20         | 35169897  | 35178226  | 5      | 5       | -0.32 | 0.62718 |
| RBM43     | 375287    | 2          | 152104728 | 152118389 | 27     | 9       | -0.34 | 0.6342  |
| UBE2J1    | 51465     | 6          | 90036344  | 90062619  | 50     | 28      | -0.34 | 0.63424 |
| BGN       | 633       | X          | 152760347 | 152775004 | 54     | 26      | -0.35 | 0.6367  |
| ANXA7     | 310       | 10         | 75135189  | 75173841  | 57     | 3       | -0.35 | 0.637   |
| NCAPD2    | 9918      | 12         | 6603298   | 6641132   | 123    | 19      | -0.35 | 0.63818 |
| RGS11     | 8786      | 16         | 318310    | 325914    | 9      | 6       | -0.35 | 0.6382  |
| UGCGL1    | 56886     | 2          | 128848754 | 128953251 | 239    | 32      | -0.37 | 0.6434  |
| RIN2      | 54453     | 20         | 19867165  | 19983103  | 372    | 74      | -0.40 | 0.65619 |
| PFKFB4    | 5210      | 3          | 48555117  | 48594227  | 32     | 13      | -0.40 | 0.6569  |
| LYRM5     | 144363    | 12         | 25348150  | 25357949  | 21     | 9       | -0.40 | 0.6571  |
| PIAS4     | 51588     | 19         | 4007749   | 4038067   | 86     | 12      | -0.41 | 0.6583  |
| PTPLA     | 9200      | 10         | 17631958  | 17659373  | 96     | 25      | -0.41 | 0.65875 |
| S100A4    | 6275      | 1          | 153516095 | 153518282 | 3      | 2       | -0.41 | 0.65993 |
| SNRPN     | 6638      | 15         | 25068794  | 25664609  | 1643   | 324     | -0.42 | 0.6615  |
| DBNL      | 28988     | 7          | 44084239  | 44101315  | 50     | 8       | -0.42 | 0.66283 |
| DPP7      | 29952     | 9          | 140004992 | 140009195 | 8      | 5       | -0.43 | 0.66471 |
| LOC401052 | 401052    | 3          | 10048102  | 10052779  | 16     | 3       | -0.43 | 0.66797 |
| SPATA6    | 54558     | 1          | 48761044  | 48937876  | 319    | 47      | -0.46 | 0.67594 |
| MCFD2     | 90411     | 2          | 47129009  | 47168994  | 171    | 22      | -0.47 | 0.67942 |
| C10orf10  | 11067     | 10         | 45471709  | 45474330  | 7      | 6       | -0.47 | 0.67968 |
| RPE       | 6120      | 2          | 210867352 | 210886291 | 18     | 9       | -0.48 | 0.684   |
| SFRS2     | 6427      | 17         | 74730197  | 74733493  | 2      | 2       | -0.48 | 0.68446 |

**Appendix 1** to Hill MJ, Killick R, Navarrete K, et al. Knockdown of the schizophrenia susceptibility gene *TCF4* alters gene expression and proliferation of progenitor cells from the developing human neocortex. *J Psychiatry Neurosci* 2016.

DOI: 10.1503/jpn.160073

*Online appendices are unedited and posted as supplied by the authors.*

| Gene     | Entrez ID | chromosome | start     | stop      | n_snps | n_param | zstat | P-value |
|----------|-----------|------------|-----------|-----------|--------|---------|-------|---------|
| PEX6     | 5190      | 6          | 42931611  | 42946981  | 50     | 9       | -0.49 | 0.68832 |
| AURKA    | 6790      | 20         | 54944445  | 54967351  | 36     | 16      | -0.49 | 0.68926 |
| PCDH20   | 64881     | 13         | 61983818  | 61989655  | 12     | 6       | -0.49 | 0.68951 |
| TSC22D3  | 1831      | X          | 106956451 | 107019017 | 40     | 19      | -0.50 | 0.69194 |
| NEK2     | 4751      | 1          | 211831598 | 211848972 | 44     | 12      | -0.50 | 0.69285 |
| EFNA1    | 1942      | 1          | 155100349 | 155107386 | 10     | 7       | -0.51 | 0.69462 |
| MFSN10   | 10227     | 4          | 2932288   | 2936586   | 10     | 8       | -0.51 | 0.69666 |
| GOT1     | 2805      | 10         | 101156627 | 101190530 | 55     | 13      | -0.52 | 0.69844 |
| SLC27A1  | 376497    | 19         | 17581300  | 17616977  | 89     | 15      | -0.52 | 0.70011 |
| C17orf90 | 339229    | 17         | 79632066  | 79633618  | 1      | 1       | -0.53 | 0.7016  |
| SAT1     | 6303      | X          | 23801275  | 23804327  | 4      | 3       | -0.53 | 0.70226 |
| CAPN5    | 726       | 11         | 76777992  | 76837201  | 152    | 32      | -0.53 | 0.70297 |
| SCRG1    | 11341     | 4          | 174309299 | 174320617 | 17     | 4       | -0.54 | 0.70645 |
| CRELD1   | 78987     | 3          | 9975524   | 9987097   | 21     | 10      | -0.54 | 0.70658 |
| SEC13    | 6396      | 3          | 10342615  | 10362858  | 61     | 16      | -0.55 | 0.70917 |
| CEP78    | 84131     | 9          | 80850991  | 80881983  | 67     | 12      | -0.56 | 0.71322 |
| TSEN34   | 79042     | 19         | 54694119  | 54698394  | 8      | 3       | -0.57 | 0.71505 |
| NOTCH2   | 4853      | 1          | 120454176 | 120612317 | 91     | 6       | -0.57 | 0.71509 |
| LSM12    | 124801    | 17         | 42112003  | 42144987  | 42     | 12      | -0.57 | 0.71621 |
| DEK      | 7913      | 6          | 18224400  | 18264799  | 74     | 22      | -0.58 | 0.71773 |
| UPF2     | 26019     | 10         | 11962021  | 12085023  | 384    | 67      | -0.59 | 0.72211 |
| COQ2     | 27235     | 4          | 84184977  | 84206067  | 39     | 12      | -0.60 | 0.7242  |
| LGMN     | 5641      | 14         | 93170152  | 93215047  | 91     | 37      | -0.62 | 0.73237 |
| SIL1     | 64374     | 5          | 138282409 | 138534065 | 302    | 40      | -0.62 | 0.73331 |
| CYB561D1 | 284613    | 1          | 110036658 | 110043063 | 7      | 4       | -0.63 | 0.73402 |
| BRI3BP   | 140707    | 12         | 125478194 | 125510349 | 109    | 18      | -0.63 | 0.73519 |
| ABCC4    | 10257     | 13         | 95672083  | 95953687  | 1066   | 244     | -0.63 | 0.73563 |
| USP13    | 8975      | 3          | 179370933 | 179507189 | 331    | 87      | -0.64 | 0.73912 |
| PWWP2B   | 170394    | 10         | 134210702 | 134231363 | 64     | 24      | -0.64 | 0.73953 |
| TOPBP1   | 11073     | 3          | 133319449 | 133380737 | 173    | 24      | -0.64 | 0.7402  |
| RPS6     | 6194      | 9          | 19376254  | 19380235  | 8      | 4       | -0.65 | 0.74086 |
| SKA1     | 220134    | 18         | 47901392  | 47920538  | 56     | 9       | -0.65 | 0.7422  |
| ITM2C    | 81618     | 2          | 231729621 | 231743963 | 54     | 23      | -0.66 | 0.74463 |
| CYB5A    | 1528      | 18         | 71920527  | 71959251  | 133    | 18      | -0.67 | 0.74997 |
| HDAC3    | 8841      | 5          | 141000443 | 141016423 | 27     | 12      | -0.68 | 0.75208 |
| IDH3G    | 3421      | X          | 153051221 | 153059967 | 12     | 5       | -0.70 | 0.75699 |
| MCM6     | 4175      | 2          | 136597196 | 136634011 | 61     | 9       | -0.70 | 0.7584  |
| COX6A1   | 1337      | 12         | 120875904 | 120878532 | 8      | 6       | -0.73 | 0.76716 |
| NOL6     | 65083     | 9          | 33461351  | 33473941  | 28     | 13      | -0.76 | 0.77737 |
| CRYAB    | 1410      | 11         | 111779350 | 111782473 | 2      | 1       | -0.77 | 0.77956 |
| BEX4     | 56271     | X          | 102470020 | 102472123 | 8      | 5       | -0.77 | 0.78009 |
| PCCA     | 5095      | 13         | 100741269 | 101182691 | 807    | 178     | -0.78 | 0.78302 |



**Appendix 1** to Hill MJ, Killick R, Navarrete K, et al. Knockdown of the schizophrenia susceptibility gene *TCF4* alters gene expression and proliferation of progenitor cells from the developing human neocortex. *J Psychiatry Neurosci* 2016.

DOI: 10.1503/jpn.160073

*Online appendices are unedited and posted as supplied by the authors.*

| Gene            | Entrez ID | chromosome | start     | stop      | n_snps | n_param | zstat | P-value |
|-----------------|-----------|------------|-----------|-----------|--------|---------|-------|---------|
| <i>NNMT</i>     | 4837      | 11         | 114166535 | 114183238 | 28     | 10      | -0.81 | 0.78977 |
| <i>PHYH</i>     | 5264      | 10         | 13319796  | 13342130  | 93     | 35      | -0.81 | 0.79183 |
| <i>ISOC1</i>    | 51015     | 5          | 128430442 | 128449721 | 69     | 15      | -0.83 | 0.7958  |
| <i>OXCT1</i>    | 5019      | 5          | 41730167  | 41870791  | 177    | 31      | -0.83 | 0.79723 |
| <i>COMMD6</i>   | 170622    | 13         | 76099350  | 76111991  | 37     | 15      | -0.83 | 0.79792 |
| <i>UBE2T</i>    | 29089     | 1          | 202300785 | 202311094 | 12     | 6       | -0.86 | 0.8057  |
| <i>C1QL1</i>    | 10882     | 17         | 43037061  | 43045644  | 30     | 12      | -0.89 | 0.8129  |
| <i>TLL12</i>    | 23170     | 22         | 43562628  | 43583137  | 90     | 22      | -0.89 | 0.81408 |
| <i>C1orf198</i> | 84886     | 1          | 230972865 | 231005335 | 118    | 36      | -0.89 | 0.81448 |
| <i>KCNJ2</i>    | 3759      | 17         | 68165676  | 68176185  | 8      | 6       | -0.93 | 0.82481 |
| <i>H2AFY</i>    | 9555      | 5          | 134670071 | 134735577 | 87     | 17      | -0.94 | 0.82596 |
| <i>RGR</i>      | 5995      | 10         | 86004809  | 86018944  | 56     | 20      | -0.97 | 0.83514 |
| <i>RIOK1</i>    | 83732     | 6          | 7390062   | 7418270   | 56     | 10      | -0.99 | 0.83903 |
| <i>LMCD1</i>    | 29995     | 3          | 8543511   | 8609806   | 248    | 54      | -1.00 | 0.84209 |
| <i>WEE1</i>     | 7465      | 11         | 9595228   | 9611314   | 26     | 10      | -1.01 | 0.8433  |
| <i>IFI44L</i>   | 10964     | 1          | 79086088  | 79111830  | 46     | 12      | -1.07 | 0.85757 |
| <i>MATN2</i>    | 4147      | 8          | 98881311  | 99048948  | 459    | 106     | -1.08 | 0.85911 |
| <i>C17orf80</i> | 55028     | 17         | 71228776  | 71245098  | 70     | 7       | -1.11 | 0.86561 |
| <i>CCRK</i>     | 23552     | 9          | 90581356  | 90589695  | 16     | 9       | -1.15 | 0.87466 |
| <i>RNF19A</i>   | 25897     | 8          | 101269288 | 101322327 | 58     | 9       | -1.15 | 0.87506 |
| <i>CEBPB</i>    | 1051      | 20         | 48807376  | 48809212  | 1      | 1       | -1.20 | 0.8854  |
| <i>CASZ1</i>    | 54897     | 1          | 10696661  | 10856707  | 275    | 75      | -1.24 | 0.89326 |
| <i>RUFY3</i>    | 22902     | 4          | 71570654  | 71674336  | 297    | 13      | -1.28 | 0.89918 |
| <i>EDNRB</i>    | 1910      | 13         | 78469616  | 78493903  | 50     | 12      | -1.36 | 0.91281 |
| <i>SSBP2</i>    | 23635     | 5          | 80715672  | 81047072  | 681    | 141     | -1.54 | 0.93852 |
| <i>OIP5</i>     | 11339     | 15         | 41601466  | 41624819  | 57     | 6       | -1.54 | 0.93876 |
| <i>C4orf46</i>  | 201725    | 4          | 159587831 | 159593202 | 2      | 2       | -1.58 | 0.94324 |
| <i>NUSAP1</i>   | 51203     | 15         | 41624926  | 41673248  | 78     | 12      | -1.59 | 0.94438 |
| <i>TMEM45A</i>  | 55076     | 3          | 100211463 | 100296285 | 208    | 41      | -1.64 | 0.94922 |
| <i>C14orf78</i> | 113146    | 14         | 105403591 | 105444694 | 110    | 22      | -1.69 | 0.95469 |
| <i>C9orf140</i> | 89958     | 9          | 139956579 | 139965028 | 19     | 7       | -1.74 | 0.95876 |
| <i>POLR2B</i>   | 5431      | 4          | 57845109  | 57897334  | 154    | 19      | -1.82 | 0.96541 |
| <i>PTPN12</i>   | 5782      | 7          | 77166773  | 77269388  | 245    | 30      | -1.95 | 0.97458 |
| <i>JDP2</i>     | 122953    | 14         | 75894509  | 75939404  | 133    | 37      | -1.96 | 0.97524 |
| <i>NAT9</i>     | 26151     | 17         | 72766686  | 72772470  | 17     | 3       | -2.17 | 0.98501 |
| <i>FBXO3</i>    | 26273     | 11         | 33762490  | 33796071  | 91     | 10      | -2.21 | 0.98647 |
| <i>MGAT2</i>    | 4247      | 14         | 50087489  | 50090199  | 1      | 1       | -2.40 | 0.9919  |
| <i>TBPL1</i>    | 9519      | 6          | 134274301 | 134308629 | 66     | 8       | -2.49 | 0.99353 |

**Appendix 1** to Hill MJ, Killick R, Navarrete K, et al. Knockdown of the schizophrenia susceptibility gene *TCF4* alters gene expression and proliferation of progenitor cells from the developing human neocortex. *J Psychiatry Neurosci* 2016.

DOI: 10.1503/jpn.160073

*Online appendices are unedited and posted as supplied by the authors.*
